1 **The GET pathway safeguards against non-imported mitochondrial protein stress**

2

3

4

5 Tianyao Xiao<sup>1</sup>, Viplendra P.S. Shakya<sup>1</sup>, and Adam L. Hughes<sup>1\*</sup>

6

7

8

9 <sup>1</sup>Department of Biochemistry, University of Utah School of Medicine, Salt Lake City, UT,  
10 84112, USA

11

12

13

14 \*Correspondence:

15 Department of Biochemistry

16 University of Utah School of Medicine

17 15 N. Medical Drive East

18 RM 4100

19 Salt Lake City, UT, 84112

20 Phone: 801-581-2481

21 Fax: 801-581-7959

22 Email: [hughes@biochem.utah.edu](mailto:hughes@biochem.utah.edu)

23

24

25

26

27

28

29

30

31

32

33

34

35

36

37

38

39

40

41

42

43

44

45

46

1 **SUMMARY**

2 Deficiencies in mitochondrial import cause the toxic accumulation of non-imported  
3 mitochondrial precursor proteins. Numerous fates for non-imported mitochondrial  
4 precursors have been identified, including proteasomal destruction, deposition into  
5 protein aggregates, and mis-targeting to other organelles. Amongst organelles, the  
6 endoplasmic reticulum (ER) has emerged as a key destination for non-imported  
7 mitochondrial proteins, but how ER-targeting of these proteins is achieved remains  
8 unclear. Here, we show that the guided entry of tail-anchored proteins (GET) complex is  
9 required for ER-targeting of endogenous mitochondrial multi-transmembrane proteins.  
10 Without a functional GET pathway, non-imported mitochondrial proteins destined for the  
11 ER are alternatively sequestered into Hsp42-dependent protein foci. The ER targeting of  
12 non-imported mitochondrial proteins by the GET complex prevents cellular toxicity and  
13 facilitates re-import of mitochondrial proteins from the ER via the recently identified ER-  
14 SURF pathway. Overall, this study outlines an important and unconventional role for the  
15 GET complex in mitigating stress associated with non-imported mitochondrial proteins.

16

17 **KEYWORDS**

18 Mitochondria, ER, protein stress, protein quality control, the GET pathway, mitochondrial  
19 carrier proteins, ER-SURF

20

21

22

23

## 24 INTRODUCTION

25 Mitochondria play crucial roles in energy production, metabolite synthesis, cell immunity,  
26 and apoptosis (Friedman and Nunnari, 2014). Abnormal mitochondrial function disrupts  
27 cellular homeostasis and is tightly linked to aging and many metabolic diseases (Wallace,  
28 2005). A major consequence of mitochondrial dysfunction is the impairment of  
29 mitochondrial protein import. The vast majority of the mitochondrial proteome, which  
30 contains over 1,000 proteins, is encoded in the nucleus and translated in the cytoplasm  
31 (Pagliarini et al., 2008). Mitochondrial precursor proteins are imported into mitochondria  
32 by translocase complexes located in the outer and inner mitochondrial membranes (OMM  
33 and IMM) through a process that depends on IMM potential (Wiedemann and Pfanner,  
34 2017). In response to mitochondrial dysfunction, mitochondrial protein import is impaired  
35 and non-imported proteins accumulate outside of mitochondria (Boos et al., 2020;  
36 Hughes and Gottschling, 2012; Wang and Chen, 2015; Wrobel et al., 2015).

37 Previous studies found that non-imported mitochondrial proteins trigger  
38 proteotoxicity, termed mitochondrial precursor overaccumulation stress (mPOS) (Wang  
39 and Chen, 2015; Wrobel et al., 2015). To date, a collection of studies have shown that  
40 mPOS triggers a cascade of cellular responses that help to promote cellular survival.  
41 These responses include translational suppression and proteasomal destruction in the  
42 cytoplasm, nucleus and at the mitochondrial surface (Boos et al., 2020; Hansen et al.,  
43 2018; Itakura et al., 2016; Mårtensson et al., 2019; Shakya et al., 2020; Wang and Chen,  
44 2015; Wrobel et al., 2015). In a recent screen to elucidate fates of non-imported  
45 mitochondrial proteins, we identified the endoplasmic reticulum (ER) as an organelle to  
46 which many non-imported mitochondrial membrane proteins were targeted (Shakya et

47 al., 2020). This observation is consistent with other studies that have also identified  
48 alternative targeting of mitochondrial proteins to the ER under a variety of conditions  
49 (Friedman et al., 2018; Hansen et al., 2018; Vitali et al., 2018). However, it remains  
50 unclear how the proteins identified in our previous screen are targeted to the ER, and  
51 what impact this has on the cell.

52 Here we sought to characterize the ER-targeting pathway of non-imported  
53 mitochondrial proteins and determine its role in mitigating mitochondrial protein stress  
54 during conditions of mitochondrial impairment. We found that the guided entry of tail-  
55 anchored proteins (GET) complex, a known post-translational ER-insertion pathway for  
56 C-terminal tail-anchored (TA) proteins (Schuldiner et al., 2008), is required for targeting  
57 non-imported mitochondrial carrier proteins to the ER. Specifically, we find that Get3, the  
58 cytosolic ATPase of the GET pathway (Schuldiner et al., 2008), physically interacts with  
59 polytopic non-imported mitochondrial membrane proteins. In the absence of a functional  
60 GET pathway, ER-destined non-imported mitochondrial proteins instead localize to  
61 Hsp42-dependent cytosolic foci that associate with both mitochondria and the ER. In  
62 addition, we show that by targeting non-imported mitochondrial proteins to the ER, the  
63 GET complex prevents cellular stress and provides substrates for the ER-SURF pathway  
64 (Hansen et al., 2018) to promote re-import of ER-localized mitochondrial proteins. Thus,  
65 it appears that the GET pathway plays an important role in maintaining cellular protein  
66 homeostasis in response to mitochondrial import failure.

67

## 68 **RESULTS**

### 69 **Non-imported mitochondrial proteins are targeted to the ER**

70 We previously conducted a microscopy-based screen using the budding yeast GFP clone  
71 collection to study the localization and abundance of over 400 mitochondrial proteins  
72 under conditions of mitochondrial membrane depolarization induced by the ionophore  
73 trifluoromethoxy carbonyl cyanide phenylhydrazone (FCCP) (Shakya et al., 2020).  
74 Through the screen, the ER was identified as a destination for approximately 3% of the  
75 non-imported mitochondrial proteome, in agreement with prior observations of  
76 mitochondrial proteins aberrantly localizing to the ER (Hansen et al., 2018; Vitali et al.,  
77 2018). We verified the localization of eight ER-localized candidates using newly  
78 generated yeast strains in which mitochondrial proteins of interest were endogenously  
79 tagged with GFP at their C-termini, and the OMM protein Tom70 was fused to mCherry  
80 to mark mitochondria (Hughes and Gottschling, 2012; Hughes et al., 2016). Using super-  
81 resolution microscopy, we found that in untreated cells, all eight proteins localized to  
82 mitochondria as expected. Upon FCCP treatment, these proteins localized to structures  
83 characteristic of yeast ER, in addition to residual mitochondrial localization (Fig. 1A, 1B,  
84 Fig. S1A-S1C). Most of these proteins were mitochondrial membrane proteins, including  
85 both OMM proteins, e.g., Alo1 (Fig. 1A), and IMM proteins, e.g., Oac1 (Fig. 1B). ER  
86 localization of these non-imported mitochondrial proteins was confirmed by their  
87 colocalization with mCherry-tagged Sec61, a component of the ER-localized translocon  
88 (Aviram and Schuldiner, 2017; Young et al., 2012) (Fig. 1C-1E, Fig. S1D-S1F). In the  
89 presence of cycloheximide, which inhibits protein synthesis, ER localization of Alo1 and  
90 Oac1 was undetectable upon FCCP treatment (Fig. S1G, S1H), indicating only newly  
91 synthesized Alo1 and Oac1 were targeted to the ER. C-terminal FLAG-tagged Alo1 and  
92 Oac1 were also targeted to the ER upon FCCP treatment as determined by indirect

93 immunofluorescence, similar with their GFP-tagged counterparts (Fig. S2A, S2B). Thus,  
94 ER localization of these mitochondrial proteins was not due to their C-terminal GFP  
95 fusion. In addition to FCCP, we also used genetic tools to specifically block mitochondrial  
96 import via deletion of *TOM70* and *TOM71*. Tom70 and Tom71 reside on the OMM and  
97 facilitate the import of both Alo1 and Oac1 (Wiedemann and Pfanner, 2017). In  
98 *tom70/tom71*Δ mutants but not in wild type cells, Alo1-GFP or Oac1-GFP colocalized with  
99 Sec61-mCherry (Fig. 1F-1H). These results confirm that several mitochondrial proteins  
100 are alternatively targeted to the ER in response to either acute or constitutive  
101 mitochondrial import blockade.

102

### 103 **The GET complex is required for ER-targeting of non-imported mitochondrial** 104 **carrier proteins**

105 To investigate the cellular machinery that targets non-imported mitochondrial proteins to  
106 the ER, we surveyed non-imported mitochondrial protein localization in a set of strains  
107 with deficiencies in known ER-import pathways, including the Sec61 translocon that  
108 translocates ER proteins through either the signal recognition particle (SRP)-dependent  
109 or SRP-independent pathways, the ER membrane protein complex (EMC), the SRP-  
110 independent targeting (SND) complex and the GET complex (Ast and Schuldiner, 2013;  
111 Aviram and Schuldiner, 2017; Aviram et al., 2016; Chitwood et al., 2018; Guna et al.,  
112 2018; Schuldiner et al., 2008; Shurtleff et al., 2018). Alo1 or Oac1 were endogenously  
113 tagged with GFP in mutants with deletion of either SRP-independent Sec61 translocon  
114 component *SEC72*, EMC component *EMC2*, SND complex components *SND2*, or GET  
115 pathway insertases *GET1/2* (Aviram et al., 2016; Schuldiner et al., 2008; Shurtleff et al.,

116 2018; Wang et al., 2014a). In response to FCCP, the ER localization of Alo1 was  
117 unaffected in any of these mutants (Fig S2C, S2D). Likewise, the ER localization of Oac1  
118 in *sec72Δ*, *emc2Δ* and *snd2Δ* upon FCCP treatment was similar to wild type (Fig S2E). In  
119 contrast, blocking the GET pathway, which normally facilitates post-translational insertion  
120 of TA proteins to the ER (Schuldiner et al., 2008), prevented FCCP-induced ER-targeting  
121 of non-imported Oac1 (Fig. 2A, 2B). Interestingly, in *get1/2Δ* mutant cells, Oac1 was  
122 sequestered in bright protein foci (Fig. 2A, 2C), consistent with previous observations that  
123 TA proteins localize to protein aggregates in GET mutants (Powis et al., 2013; Schuldiner  
124 et al., 2008). We examined additional ER-targeted non-imported mitochondrial proteins  
125 in cells lacking Get1/2 and found that the FCCP-induced ER-targeting of Mir1 and Dic1,  
126 both members of the multi-pass mitochondrial carrier protein family like Oac1 (Palmieri et  
127 al., 2006), was also dependent on the GET pathway (Fig. S3A). Similarly, Om45, an OMM  
128 protein, localized to the vacuole instead of the ER in *get1/2Δ* mutants upon FCCP  
129 treatment (Fig. S3B). In contrast, other ER-destined non-imported mitochondrial proteins  
130 still localized to the ER in GET-deficient cells when treated with FCCP (Fig. S3C, S3D),  
131 suggesting that like Alo1, their targeting is independent of the GET machinery and that  
132 multiple mechanisms exist to target non-imported proteins to the ER.

133 To understand the involvement of other proteins of the GET complex in ER-  
134 targeting of non-imported mitochondrial proteins, we tested the requirement of upstream  
135 GET components in delivery of Oac1 to the ER, including the cytosolic ATPase Get3,  
136 which binds and recruits substrates to the ER insertases Get1/2, and the cytosolic  
137 chaperones Get4, Get5 and Sgt2, which bind and stabilize substrates to promote  
138 downstream ER-targeting by Get1/2/3 (Wang et al., 2010, 2014a). Like Get1/2, loss of

139 Get3 also impacted targeting of Oac1 to the ER (Fig. S4A), with reduced ER-localization  
140 upon FCCP treatment (Fig. S4B) and increased number of protein foci containing Oac1  
141 (Fig. S4C). Deletion of *GET5* also blunted ER-targeting upon FCCP treatment, but did not  
142 lead to the production of Oac1-GFP foci (Fig. S4A-S4C). Knockout of *GET4* and *SGT2*,  
143 however, had little effect (Fig. S4A-S4C). Thus, core GET components, including  
144 Get1/2/3 and partially Get5, are required for targeting mitochondrial carrier proteins to the  
145 ER, but other components of the GET pathway are dispensable.

146

### 147 **Cytosolic ATPase Get3 physically interacts with Oac1**

148 To further investigate the interplay between the GET pathway components and non-  
149 imported mitochondrial carrier proteins such as Oac1, we created a strain expressing an  
150 mCherry-tagged version of Get3, the cytosolic ATPase that normally resides in the  
151 cytoplasm and recruits cytosolic GET substrates to ER-localized Get1/2 (Schuldiner et  
152 al., 2008; Wang et al., 2010). In *get1/2Δ* mutants, it has been shown that Get3 localizes  
153 to cytosolic foci containing GET substrates (Powis et al., 2013; Schuldiner et al., 2008).  
154 Like canonical TA substrates of the GET pathway (Powis et al., 2013), we found that in  
155 *get1/2Δ* mutant cells, half of the Oac1-GFP foci were colocalized or closely associated  
156 with Get3-mCherry foci, even in the absence of FCCP (Fig. 2D, 2E). Likewise, co-  
157 immunoprecipitation analysis indicated that a portion of FLAG-tagged Get3 constitutively  
158 co-purified with GFP-tagged Oac1 (Fig. 2F). This interaction persisted regardless of the  
159 nature of the epitope tags on the protein, or which of the proteins was used as the bait  
160 (Fig. S4D). In contrast, other non-ER targeted mitochondrial proteins, including Tom70,  
161 Tim50 and Por1, were not co-immunoprecipitated with Get3 (Fig. S4D). Additionally, no



162 interaction was detected between Get3 and Alo1, a mitochondrial protein that was  
163 targeted to the ER upon impaired mitochondrial import independently of the GET complex  
164 (Fig. S4E). This indicates that Get3 selectively interacts with non-imported mitochondrial  
165 carrier proteins and promotes their ER-targeting.

166

### 167 **Oac1-GFP localizes to mitochondrial- and ER-associated Hsp42-dependent foci in** 168 **the absence of a functional GET pathway**

169 In cells with a non-functional GET pathway, mitochondrial carrier proteins were  
170 sequestered into protein foci (Fig 2A, 2C, Fig. S3A). To characterize these foci, we  
171 analyzed their localization in cells with fluorescently-tagged organelle markers using  
172 super-resolution microscopy. In *get1/2Δ* mutant cells, 97% of protein foci containing Oac1  
173 were associated with mitochondria marked by Tom70 (Fig. 3A) or the ER marked by  
174 Sec61 (Fig. 3B), which is similar with previously characterized cytosolic protein  
175 aggregates (Zhou et al., 2014). To verify whether these foci corresponded to protein  
176 aggregates, we labelled Hsp42 and Hsp104, chaperones that commonly localize to  
177 cytosolic protein aggregates in yeast (Miller et al., 2015; Zhou et al., 2014), with mCherry  
178 and examined localization with Oac1-GFP foci. Interestingly, nearly all Oac1-GFP foci  
179 contained Hsp42 and Hsp104 regardless of FCCP addition (Fig. 3C-3F). Deletion of  
180 *HSP42*, but not *HSP104*, diminished the formation of Oac1-foci in *get1/2Δ* mutants (Fig.  
181 3G-3H). Thus, without a functional GET pathway, Hsp42 mediates the sequestration of  
182 non-imported mitochondrial proteins that are normally destined to the ER.

183

### 184 **GET-dependent ER targeting prevents cellular toxicity**

185 Because non-imported mitochondrial proteins have been shown to be harmful to cells  
186 (Wang and Chen, 2015; Wrobel et al., 2015), we investigated whether the ER-targeting  
187 of non-imported mitochondrial proteins by the GET pathway prevents their toxicity. To do  
188 this, we tested the growth of GET mutants under stress of mitochondrial import failure. In  
189 comparison to wild-type cells, *get1/2* $\Delta$  cells exhibited diminished growth in the presence  
190 of FCCP (Fig. 4A), and *get3* $\Delta$  cells showed slight growth defects (Fig. 4B), in alignment  
191 with their effect on ER-targeting of mitochondrial proteins. Similarly, deletion of *GET1* or  
192 *GET2* caused fitness defects in cells lacking the mitochondrial import receptors Tom70/71  
193 (Fig. 4C, 4D), suggesting the GET pathway mitigates cellular stress under conditions of  
194 mitochondrial import impairment.

195

#### 196 **GET-dependent ER targeting provides substrates for the ER-SURF pathway**

197 In agreement with our current findings, it was recently demonstrated that the J-protein,  
198 Djp1, shuttles ER-localized mitochondrial proteins from the ER membrane to  
199 mitochondria, promoting additional attempts of mitochondrial import (Hansen et al., 2018).  
200 A major question surrounding this pathway, termed ER-SURF, is the nature of the cellular  
201 machinery that initially targets mitochondrial proteins to the ER (Fig. 4E). With our  
202 discovery that the GET pathway facilitates ER-targeting of non-imported mitochondrial  
203 membrane proteins, we wondered whether the GET targeting system is an integral part  
204 of relaying non-imported mitochondrial precursors to the ER-SURF pathway. To test  
205 whether GET-dependent targeting of non-imported mitochondrial proteins acts upstream  
206 of Djp1, we tagged Oac1, which requires the GET complex to be localized to the ER, with  
207 GFP, in *djp1* $\Delta$  mutant cells. Interestingly, ER-localized Oac1 was observed in 55% of

208 *djp1* $\Delta$  cells without FCCP treatment (Fig. 4F, 4G) and more than 60% with FCCP  
209 treatment (Fig. 4G). Both rates are higher than observed in wild-type cells (Fig. 4G).  
210 Importantly, the ER localization of Oac1 in *djp1* $\Delta$  cells was dramatically reduced in the  
211 absence of *GET1/2* (Fig. 4G), and protein foci containing Oac1 were present in  
212 *djp1* $\Delta$ *get1/2* $\Delta$  triple mutants (Fig. 4H). These data are consistent with a model in which  
213 the GET pathway acts upstream of the ER-SURF pathway and is required to deliver non-  
214 imported mitochondrial proteins to the ER for eventual mitochondrial re-import via Djp1.

215

## 216 **DISCUSSION**

217 We previously identified the ER as a major destination of non-imported mitochondrial  
218 membrane proteins (Shakya et al., 2020). In this study, we further characterized the ER-  
219 targeting pathway of non-imported mitochondrial proteins. We show that the GET  
220 complex is required for ER-targeting of a specific group of proteins, the mitochondrial  
221 carrier proteins. With a dysfunctional GET pathway, mitochondrial membrane proteins  
222 cannot be delivered to the ER, and are instead sequestered into mitochondrion- and ER-  
223 associated cytosolic protein foci. Overall, our data support two roles for the GET pathway  
224 in quality control of ER-targeted mitochondrial proteins: mitigation of cellular stress by  
225 preventing cytosolic aggregation, and also delivery of substrates to the Djp1-dependent  
226 ER-SURF pathway for their re-import into mitochondria (Fig. 4I).

227 This study outlines an important and unconventional role for the GET complex in  
228 targeting multi-pass transmembrane proteins to the ER. Canonically, the GET pathway is  
229 known to insert C-terminal single-pass tail-anchored proteins to the ER (Aviram and  
230 Schuldiner, 2017; Schuldiner et al., 2008). However, our current results, along with a

231 recent study showing that the GET complex facilitates localization of over-expressed  
232 OMM proteins to the ER (Vitali et al., 2018), suggest that the GET system is capable of  
233 handling multi-pass membrane proteins in an unknown capacity. Moving forward, it will  
234 be interesting to understand how the GET machinery structurally interacts with  
235 mitochondrial carrier proteins, including whether this interaction is direct or requires  
236 additional machinery.

237 Finally, our results highlight the importance of the interplay between the multitude  
238 of quality control systems that coordinately prevent toxicity induced by non-imported  
239 mitochondrial precursors. While we found that cells protect against mitochondrial protein  
240 stress through alternative ER targeting via the GET pathway, several ER-destined  
241 mitochondrial proteins analyzed here did not appear to rely on the GET pathway for their  
242 ER targeting. Identifying the systems that target these proteins will be necessary to fully  
243 understand how alternative ER delivery prevents the toxicity of non-imported  
244 mitochondrial precursors. Moreover, the degree of coordination between the many  
245 systems that mitigate the stress associated with non-imported mitochondrial precursors  
246 remains unclear. For example, while our current results suggest that GET-dependent ER  
247 targeting plays a role upstream of the ER-SURF pathway, whether the GET machinery  
248 directly communicates with the ER-SURF components remains unknown. Addressing  
249 some of these questions is key to unlocking the full extent to which the non-imported  
250 mitochondrial proteome impairs cellular health during times of mitochondrial dysfunction.

251

## 252 **ACKNOWLEDGEMENTS**

253 We thank members of the A.L.H. and J.M.S. laboratory for discussion and manuscript  
254 comments, and Dr. Nikolaus Pfanner for Tim50 and Tom70 antisera. We thank Janet  
255 Shaw (Utah) for contributing stipend support for T.X. Research was supported by NIH  
256 grants GM119694 (A.L.H.) and the Howard Hughes Medical Institute (J.M.S.). A.L.H.  
257 was further supported by an American Federation for Aging Research Junior Research  
258 Grant, United Mitochondrial Disease Foundation Early Career Research Grant, Searle  
259 Scholars Award, and Glenn Foundation for Medical Research Award.

260

## 261 **AUTHOR CONTRIBUTIONS**

262 Conceptualization, T.X., V.P.S.S., A.L.H.; Methodology, T.X., V.P.S.S., A.L.H.; Formal  
263 Analysis, T.X.; Investigation, T.X.; Writing T.X. and A.L.H.; Visualization, T.X.;  
264 Supervision, A.L.H.; Funding Acquisition, A.L.H.

265

## 266 **DECLARATION OF INTERESTS**

267 The authors declare no competing interests.

268

## 269 **FIGURE LEGENDS**

### 270 **Figure 1. Non-imported mitochondrial proteins are targeted to the ER.**

271 (A and B) Super-resolution images and line scan analysis of yeast expressing Alo1-GFP

272 (A) or Oac1-GFP (B) and Tom70-mCherry +/- FCCP.

273 (C and D) Super-resolution images and line scan analysis of yeast expressing Alo1-

274 GFP (C) or Oac1-GFP (D) and Sec61-mCherry +/- FCCP.

275 (E) Quantification of cells with ER localization of Alo1- or Oac1-GFP +/- FCCP. N > 100  
276 cells per replicate, error bars = SEM of three replicates.

277 (F and G) Super-resolution images and line scan analysis of *wild type* or *tom70/71Δ*  
278 expressing Alo1-GFP (F) or Oac1-GFP (G) and Sec61-mCherry.

279 (H) Quantification of cells with ER localization of Alo1- or Oac1- GFP in wild type cells  
280 or *tom70/71Δ* mutants. N > 100 cells per replicate, error bars = SEM of three replicates.

281 For (A-D, F and G), white arrow marks perinuclear ER. White line marks fluorescence  
282 intensity profile position. Left and right Y axis (line scan graph) correspond to GFP and  
283 mCherry fluorescence intensity respectively. Black arrow (line scan graph) marks  
284 colocalization. Images show single focal plane. Scale bar = 2 μm.

285 See also Figure S1.

286

287 **Figure 2. The GET complex is required for ER-targeting of non-imported**  
288 **mitochondrial carrier proteins.**

289 (A) Super-resolution images of wild-type or *get1/2Δ* mutant cells expressing Oac1-GFP  
290 and Tom70-mCherry +/- FCCP.

291 (B and C) Quantification of a showing the percentage of cells with Oac1-GFP localized  
292 to the ER (B) or protein foci (C). N > 100 cells per replicate, error bars = SEM of three  
293 replicates.

294 (D) Super-resolution images of wild-type or *get1/2Δ* cells expressing Oac1-GFP and  
295 Get3-mCherry +/- FCCP.

296 (E) Quantification of (D) showing the number of foci only containing Oac1-GFP (green),  
297 Get3-mCherry (magenta) or colocalized/associated Oac1-GFP and Get3-mCherry

298 (yellow) per 100 cells +/- FCCP. N > 100 cells per replicate of three replicates, values  
299 are normalized to number of foci per 100 cells.

300 (F) Western blot probing for GFP and FLAG in input, unbound or elution products of  
301 immunoprecipitated Oac1-GFP in the indicated yeast strains.

302 White arrow marks perinuclear ER. White arrowhead marks protein foci containing  
303 Oac1-GFP. Yellow arrowheads mark protein foci containing Get3-mCherry. Images  
304 show single focal plane. Scale bar = 2  $\mu$ m.

305 See also Figure S2-S4.

306

307 **Figure 3. Oac1-GFP localizes to mitochondrial- and ER-associated Hsp42-**  
308 **dependent foci in the absence of a functional GET pathway.**

309 (A-D) Super-resolution images and line scan analysis of *get1/2* $\Delta$  mutant yeast  
310 expressing Oac1-GFP and Tom70-mCherry (A), Sec61-mCherry (B), Hsp42-mCherry  
311 (C) or Hsp104-mCherry (D). White arrowhead marks protein foci containing Oac1-GFP.  
312 White line marks fluorescence intensity profile position. Left and right Y axis (line scan  
313 graph) correspond to GFP and mCherry fluorescence intensity, respectively. Black  
314 arrow marks protein foci position and white arrow marks mitochondria (A) or ER (B)  
315 position that is associated with protein foci. For the quantification in A and B, N > 100  
316 cells per replicate of three replicates.

317 (E and F) Quantification of (C) and (D) respectively showing the number of foci only  
318 containing Oac1-GFP (green), Hsp42-mCherry (E) or Hsp104-mCherry (F) (magenta) or  
319 both (yellow) per 100 cells +/- FCCP. N > 100 cells per replicate of three replicates,  
320 values are normalized to number of foci per 100 cells.

321 (G) Widefield images of wild-type cells and the indicated mutant yeast expressing Oac1-  
322 GFP and Tom70-mCherry +/- FCCP. White arrows mark perinuclear ER. White  
323 arrowheads mark protein foci containing Oac1-GFP.

324 (H) Quantification of (G). N > 100 cells per replicate, error bars = SEM of three  
325 replicates.

326 Images show single focal plane. Scale bar = 2  $\mu$ m.

327

328 **Figure 4. GET-dependent ER targeting prevents toxicity and provides substrates**  
329 **for the ER-SURF pathway.**

330 (A and B) Five-fold serial dilutions of wild-type cells and *get1/2* $\Delta$  (A) or *get3* $\Delta$  (B) mutant  
331 cells on YPD +/- FCCP agar plates.

332 (C and D) Five-fold serial dilutions of wild-type and the indicated mutant cells on YPD  
333 agar plates.

334 (E) Schematic graph of the ER-SURF pathway.

335 (F) Super-resolution images of wild-type and *djp1* $\Delta$  cells expressing Oac1-GFP and  
336 Tom70-mCherry. White arrows mark perinuclear ER. Images show single focal plane.  
337 Scale bar = 2  $\mu$ m.

338 (G and H) Quantification of the percentage of cells with Oac1-GFP localized to the ER

339 (G) or the cytosolic foci (H) in wild-type or the indicated mutant cells. N > 100 cells per  
340 replicate, error bars = SEM of three replicates.

341 (I) Schematic overview of the roles of GET-dependent ER targeting in preventing  
342 protein aggregation and toxicity and facilitating re-delivery of mitochondrial proteins.

343



344 **Figure S1. Related to Fig. 1**

345 (A-C) Super-resolution images of yeast expressing indicated OMM proteins (A), IMM  
346 proteins (B) or mitochondrial proteins with unknown sub-organelle localization (C)  
347 tagged with GFP and Tom70-mCherry +/- FCCP. Sub-organelle localizations of  
348 mitochondrial proteins were obtained from SGD.

349 (D-F) Super-resolution images of yeast expressing indicated OMM proteins (D), IMM  
350 proteins (E) or mitochondrial proteins with unknown sub-organelle localization (F)  
351 tagged with GFP and Sec61-mCherry +/- FCCP.

352 (G and H) Widefield images of yeast expressing Alo1-GFP (G) or Oac1-GFP (H) and  
353 Tom70-mCherry +/- FCCP +/- CHX (cycloheximide).

354 White arrows mark perinuclear ER. Images show single focal plane. Scale bar = 2  $\mu$ m.

355

356 **Figure S2. Related to Fig. 1 and Fig. 2**

357 (A and B) Widefield images of indirect immunofluorescence staining against the FLAG  
358 epitope in yeast expressing Alo1- or Oac1-FLAG and Tom70-mCherry (A) or Sec61-  
359 mCherry (B) +/- FCCP. Nucleus stained with NucBlue.

360 (C) Widefield images of wild-type or the indicated mutant yeast expressing Alo1-GFP  
361 and Tom70-mCherry +/- FCCP.

362 (D) Super-resolution images of wild-type or *get1/2* $\Delta$  mutant yeast expressing Alo1-GFP  
363 and Tom70-mCherry +/- FCCP.

364 (E) Widefield images of wild-type or the indicated mutant yeast expressing Oac1-GFP  
365 and Tom70-mCherry +/- FCCP.

366 White arrow marks perinuclear ER. Images show single focal plane. Scale bar = 2  $\mu$ m.

367

368 **Figure S3. Related to Fig. 2**

369 (A) Super-resolution images of wild-type or *get1/2Δ* mutant yeast expressing IMM  
370 carrier proteins Mir1- or Dic1- GFP and Tom70-mCherry *-/+* FCCP. White arrowhead  
371 marks protein foci containing GFP-tagged mitochondrial proteins.

372 (B) Widefield images of wild-type or *get1/2Δ* yeast expressing OMM protein Om45-GFP  
373 and Tom70-mCherry *-/+* FCCP. White arrow marks perinuclear ER. White arrowhead  
374 marks vacuole.

375 (C and D) Widefield images of wild-type or *get1/2Δ* mutant yeast expressing IMM  
376 protein Oxa1-GFP (C) or mitochondrial matrix protein Put1- or Tuf1-GFP (D) and  
377 Tom70-mCherry *-/+* FCCP.

378 White arrow marks perinuclear ER. Images show single focal plane. Scale bar = 2 μm.

379

380 **Figure S4. Related to Fig. 2**

381 (A) Super-resolution images of the indicated mutant yeast expressing Oac1-GFP and  
382 Tom70-mCherry *-/+* FCCP. White arrows mark perinuclear ER. White arrowhead marks  
383 protein foci containing Oac1-GFP. Images show single focal plane. Scale bar = 2 μm.

384 (B and C) Quantification of (A) showing the percentage of cells with Oac1-GFP localized  
385 to the ER (B) or cytosolic foci (C) in wild-type or the indicated mutant cells. N > 100 cells  
386 per replicate, error bars = SEM of three replicates.

387 (D) Western blot probing for GFP, FLAG-tag, Tom70, Tim50 and Por1 in input, unbound  
388 or elution products of immunoprecipitated Get3-GFP in the indicated yeast strains.

389 (E) Western blot probing for GFP and FLAG-tag in input, unbound or elution products of  
390 immunoprecipitated Get3-GFP in the indicated yeast.

391

## 392 **STAR METHODS**

### 393 **LEAD CONTACT AND MATERIALS AVAILABILITY**

394 Further information and requests for resources and reagents should be directed to and  
395 will be fulfilled by the Lead Contact, Adam L. Hughes ([hughes@biochem.utah.edu](mailto:hughes@biochem.utah.edu)). All  
396 unique/stable reagents generated in this study are available from the Lead Contact  
397 without restriction.

398

### 399 **EXPERIMENTAL MODEL AND SUBJECT DETAILS**

#### 400 **Yeast Strains**

401 All yeast strains are derivatives of *Saccharomyces cerevisiae* S288c (BY)(Brachmann et  
402 al., 1998) and are listed in Supplementary Table 1. Strains expressing tagged proteins  
403 from their native loci were created by one step PCR-mediated C-terminal endogenous  
404 epitope tagging using standard techniques and the oligo pairs listed in Supplementary  
405 Table 2(Brachmann et al., 1998; Sheff and Thorn, 2004). Plasmid templates for GFP  
406 tagging were from the pKT series of vectors(Sheff and Thorn, 2004). Plasmid templates  
407 for mCherry tagging were from the pKT series of vectors(Sheff and Thorn, 2004) or  
408 pFA6a-mCherry-HphMX (Addgene 39295)(Wang et al., 2014b). Integrations were  
409 confirmed by correct localized expression of the fluorophore by microscopy. Plasmid  
410 template for FLAG tagging was the pFA6a-5FLAG-KanMX6 (Addgene 15983)(Noguchi  
411 et al., 2008). Integrations were confirmed by a combination of colony PCR across the

412 chromosomal insertion site and correct band size by western blot. Deletion strains were  
413 created by one step PCR-mediated gene replacement using the oligos pairs listed in  
414 Supplementary table 2 and plasmid templates from the pRS series vectors(Brachmann  
415 et al., 1998). Correct integrations were confirmed with colony PCR across the  
416 chromosomal insertion site.

417

#### 418 **Yeast Cell Culture and Media**

419 Yeast cells were grown exponentially for 15-16 hours at 30°C to a final density of  $2-7 \times 10^6$   
420 cells/mL prior to starting any treatments. Cells were cultured in YPAD medium (1% yeast  
421 extract, 2% peptone, 0.005% adenine, 2% glucose). For FCCP treatment, overnight log-  
422 phase cell cultures were grown in the presence of FCCP (final concentration of 10  $\mu$ M) or  
423 cycloheximide (100  $\mu$ g/mL) for 4-5 hours.

424

#### 425 **METHOD DETAILS**

##### 426 **Microscopy**

427 Optical z-sections of live yeast cells were acquired with a ZEISS Axio Imager M2  
428 equipped with a ZEISS AxioCam 506 monochromatic camera, 100x oil-immersion  
429 objective (plan apochromat, NA 1.4), a AxioObserver 7 (Carl Zeiss) equipped with a PCO  
430 Edge 4.2LT Monochrome, Air Cooled, USB 3 CCD camera with a Solid-State Colibri 7  
431 LED illuminator and 100X oil-immersion objective (Carl Zeiss, Plan Apochromat, NA 1.4),  
432 a ZEISS LSM800 equipped with an Airyscan detector, 63x oil-immersion objective (plan  
433 apochromat, NA 1.4) or a ZEISS LSM880 equipped with an Airyscan detector, 63x oil-  
434 immersion objective (plan apochromat, NA 1.4). Widefield images were acquired with

435 ZEN (Carl Zeiss) and processed with Fiji(Schindelin et al., 2012). Super-resolution  
436 images were acquired with ZEN (Carl Zeiss) and processed using the automated  
437 Airyscan processing algorithm in ZEN (Carl Zeiss) and Fiji. Individual channels of all  
438 images were minimally adjusted in Fiji to match the fluorescence intensities between  
439 channels for better visualization. Line scan analysis was performed on non-adjusted,  
440 single z-sections in Fiji. All images shown in Figures represent a single optical section.

441

#### 442 **Serial-Dilution Growth Assays**

443 Five-fold serial dilutions of exponentially growing yeast cells were diluted in ddH<sub>2</sub>O and 3  
444  $\mu$ L of each dilution was spotted onto YPD (1% yeast extract, 2% peptone, 2% glucose).  
445 Final concentration of FCCP is 7  $\mu$ M. Total cells plated in each dilution spot were 5000,  
446 1000, 20, 40, and 8. Plates were cultured at 30°C for 36 hours before obtaining images.

447

#### 448 **Immunoprecipitation and Western Blotting**

449 Immunoprecipitation and western blot were carried out as described previously(Hughes  
450 et al., 2016). Cells were grown as described above.  $1.2 \times 10^8$  total cells were harvested,  
451 resuspended in 500  $\mu$ L of Lysis Buffer (50 mM Tris pH7.5, 150 mM NaCl, 1 mM EDTA,  
452 10% Glycerol, 1% IGEPAL (NP-40 substitute), 100  $\mu$ M PMSF) and lysed with glass  
453 beads using an Omni Bead Ruptor 12 Homogenizer (8 cycles of 20 seconds each).  
454 Cells lysates were cleared by centrifugation at 2,000xg for 3 minutes to remove cell  
455 debris, followed by centrifugation at 11,000xg for 5 minutes. Supernatant was collected  
456 to a new tube. Pellets were resuspended in 50  $\mu$ L of SUME buffer (1% SDS, 8 M Urea,  
457 10 mM MOPS, pH 6.8, 10 mM EDTA and 10 mM NEM) and heated at 42 °C for 5

458 minutes. After centrifugation at 11,000xg for 5 minutes, supernatant of cell pellet  
459 resuspension was combined with supernatant from lysate clearance centrifugation, and  
460 total volume was adjusted to 1 mL by adding lysis buffer. Lysates were incubated with  
461 25  $\mu$ L of pre-balanced anti-GFP bead slurry (GTMA, GFP-Trap®\_MA, chromotek) at  
462 4 °C overnight and then washed 4 times for 10 minutes in lysis buffer.  
463 Immunoprecipitated proteins were eluted by incubating beads in 2x Laemmli Buffer  
464 (63 mM Tris pH 6.8, 2% (w/v) SDS, 10% (v/v) glycerol, 1 mg/mL bromophenol blue, 1%  
465 (v/v)  $\beta$ -mercaptoethanol) at 90 °C for 10 minutes. Cells extracts and elution products  
466 were resolved on Bolt 4-12% Bis-Tris Plus Gels (NW04125BOX, Thermo Fisher) with  
467 NuPAGE MES SDS Running Buffer (NP0002-02, Thermo Fisher) and transferred to  
468 nitrocellulose membranes. Membranes were blocked and probed in blocking buffer (1x  
469 PBS, 0.05% Tween 20, 5% non-fat dry milk) using the primary antibodies for FLAG  
470 (ThermoFisher) and GFP (Sigma Millipore) and HRP conjugated secondary antibodies  
471 (715-035-150, Jackson ImmunoResearch). Blots were developed with SuperSignal West  
472 Pico Chemiluminescent substrate (34580, Thermo Fisher) and exposed with a Bio-Rad  
473 Chemidoc MP system.

474

#### 475 **Yeast Indirect Immunofluorescence (IIF) Staining**

476 For IIF staining, overnight log-phase cell cultures were grown with or without FCCP for  
477 3.5 hours in YPAD to OD=0.4. Cells were harvested by centrifugation and fixed in 10 mL  
478 fixation medium (4% Polyformaldehyde in YPAD) for one hour. Fixed yeast cells were  
479 washed with Wash Buffer (0.1 M Tris, pH=8, 1.2 M Sorbitol) twice and incubated in 2 mL  
480 DTT Buffer (10 mM DTT in 0.1 M Tris, pH=9.4) at room temperature for 10 minutes.

481 Spheroplasts were generated by incubating cells in 2 mL Zymolyase Buffer (0.1 M KPi,  
482 pH=6.5, 1.2 M Sorbitol, 0.25 mg/mL Zymolyase) at 30°C for 30 minutes. Spheroplasts  
483 were gently diluted in 1:40 using Wash Buffer and attached to glass slides pre-coated  
484 with 0.1% poly-L-Lysine (2 mg/mL). Samples were permeabilized in cold 0.1% Triton-  
485 X100 in PBS for 10 minutes at 4 °C, briefly dried and blocked in Wash Buffer containing  
486 1% BSA at room temperature for 30 minutes. After blocking, samples were incubated  
487 with primary antibody (Monoclonal ANTI-FLAG® M2 antibody produced in mouse, 1:200  
488 diluted in Wash Buffer containing 1% BSA) for 1.5 hours at room temperature and  
489 secondary antibody (Goat anti-Mouse IgG (H+L) Cross-Adsorbed Secondary Antibody,  
490 Alexa Fluor 488, 1:300 diluted in Wash Buffer containing 1% BSA) for 45 minutes at room  
491 temperature. Samples were washed 10 times after each incubation with Wash Buffer  
492 containing 1% BSA and 0.1% Tween-20. Slides were washed twice with Wash Buffer  
493 before sealing, and mounted with hardset medium (ProLong™ Glass Antifade Mountant  
494 with NucBlue™ Stain (P36981), Invitrogen) overnight. Widefield images were acquired  
495 as described above.

496

## 497 **QUANTIFICATION AND STATISTICAL ANALYSIS**

498 The number of replicates, what  $n$  represents, and dispersion and precision measures  
499 are indicated in the figure legends. In general, quantifications show the mean  $\pm$   
500 standard error from three biological replicates with  $n = 100$  cells per experiment. In  
501 experiments with data depicted from a single biological replicate, the experiment was  
502 repeated with the same results.

503

504 **DATA AND CODE AVAILABILITY**

505 This study did not generate datasets or code.

506

507 **REFERENCES**

508 Ast, T., and Schuldiner, M. (2013). All roads lead to Rome (but some may be harder to  
509 travel): SRP-independent translocation into the endoplasmic reticulum. *Crit. Rev.*

510 *Biochem. Mol. Biol.* *48*, 273–288.

511 Aviram, N., and Schuldiner, M. (2017). Targeting and translocation of proteins to the  
512 endoplasmic reticulum at a glance. *J. Cell Sci.* *130*, 4079–4085.

513 Aviram, N., Ast, T., Costa, E.A., Arakel, E.C., Chuartzman, S.G., Jan, C.H.,

514 Haßdenteufel, S., Dudek, J., Jung, M., Schorr, S., et al. (2016). The SND proteins

515 constitute an alternative targeting route to the endoplasmic reticulum. *Nature* *540*, 134–  
516 138.

517 Boos, F., Labbadia, J., and Herrmann, J.M. (2020). How the Mitoprotein-Induced Stress  
518 Response Safeguards the Cytosol: A Unified View. *Trends Cell Biol.* *30*, 241–254.

519 Brachmann, C.B., Davies, A., Cost, G.J., Caputo, E., Li, J., Hieter, P., and Boeke, J.D.

520 (1998). Designer deletion strains derived from *Saccharomyces cerevisiae* S288C: A

521 useful set of strains and plasmids for PCR-mediated gene disruption and other  
522 applications. *Yeast* *14*, 115–132.

523 Chitwood, P.J., Juszkievicz, S., Guna, A., Shao, S., and Hegde, R.S. (2018). EMC Is

524 Required to Initiate Accurate Membrane Protein Topogenesis. *Cell* *175*, 1507–1519.

525 Friedman, J.R., and Nunnari, J. (2014). Mitochondrial form and function. *Nature* *505*,

526 335–343.



527 Friedman, J.R., Kannan, M., Toulmay, A., Jan, C.H., Weissman, J.S., Prinz, W.A., and  
528 Nunnari, J. (2018). Lipid Homeostasis Is Maintained by Dual Targeting of the  
529 Mitochondrial PE Biosynthesis Enzyme to the ER. *Dev. Cell* 44, 261–270.

530 Guna, A., Volkmar, N., Christianson, J.C., and Hegde, R.S. (2018). The ER membrane  
531 protein complex is a transmembrane domain insertase. *Science*. 359, 470–473.

532 Hansen, K.G., Aviram, N., Laborenz, J., Bibi, C., Meyer, M., Spang, A., Schuldiner, M.,  
533 and Herrmann, J.M. (2018). An ER surface retrieval pathway safeguards the import of  
534 mitochondrial membrane proteins in yeast. *Science*. 361, 1118–1122.

535 Hughes, A.L., and Gottschling, D.E. (2012). An early age increase in vacuolar pH limits  
536 mitochondrial function and lifespan in yeast. *Nature* 492, 261–265.

537 Hughes, A.L., Hughes, C.E., Henderson, K.A., Yazvenko, N., and Gottschling, D.E.  
538 (2016). Selective sorting and destruction of mitochondrial membrane proteins in aged  
539 yeast. *Elife* 5, e13943.

540 Itakura, E., Zavodszky, E., Shao, S., Wohlever, M.L., Keenan, R.J., and Hegde, R.S.  
541 (2016). Ubiquilins Chaperone and Triage Mitochondrial Membrane Proteins for  
542 Degradation. *Mol. Cell* 7, 21–33.

543 Mårtensson, C.U., Priesnitz, C., Song, J., Ellenrieder, L., Doan, K.N., Boos, F.,  
544 Floerchinger, A., Zufall, N., Oeljeklaus, S., Warscheid, B., et al. (2019). Mitochondrial  
545 protein translocation-associated degradation. *Nature* 569, 679–683.

546 Miller, S.B., Ho, C., Winkler, J., Khokhrina, M., Neuner, A., Mohamed, M.Y., Guilbride,  
547 D.L., Richter, K., Lisby, M., Schiebel, E., et al. (2015). Compartment-specific  
548 aggregates direct distinct nuclear and cytoplasmic aggregate deposition. *EMBO J.* 34,  
549 778–797.

550 Noguchi, C., Garabedian, M. V., Malik, M., and Noguchi, E. (2008). A vector system for  
551 genomic FLAG epitope-tagging in *Schizosaccharomyces pombe*. *Biotechnol. J.* 3,  
552 1280–1285.

553 Pagliarini, D.J., Calvo, S.E., Chang, B., Sheth, S.A., Vafai, S.B., Ong, S.E., Walford,  
554 G.A., Sugiana, C., Boneh, A., Chen, W.K., et al. (2008). A Mitochondrial Protein  
555 Compendium Elucidates Complex I Disease Biology. *Cell* 134, 112–123.

556 Palmieri, F., Agrimi, G., Blanco, E., Castegna, A., Di Noia, M.A., Iacobazzi, V., Lasorsa,  
557 F.M., Marobbio, C.M.T., Palmieri, L., Scarcia, P., et al. (2006). Identification of  
558 mitochondrial carriers in *Saccharomyces cerevisiae* by transport assay of reconstituted  
559 recombinant proteins. *Biochim. Biophys. Acta - Bioenerg.* 1757, 1249–1262.

560 Powis, K., Schrul, B., Tienson, H., Gostimskaya, I., Breker, M., High, S., Schuldiner, M.,  
561 Jakob, U., and Schwappach, B. (2013). Get3 is a holdase chaperone and moves to  
562 deposition sites for aggregated proteins when membrane targeting is blocked. *J. Cell*  
563 *Sci.* 126, 473–483.

564 Schindelin, J., Arganda-Carreras, I., Frise, E., Kaynig, V., Longair, M., Pietzsch, T.,  
565 Preibisch, S., Rueden, C., Saalfeld, S., Schmid, B., et al. (2012). Fiji: An open-source  
566 platform for biological-image analysis. *Nat. Methods* 9, 676–682.

567 Schuldiner, M., Metz, J., Schmid, V., Denic, V., Rakwalska, M., Schmitt, H.D.,  
568 Schwappach, B., and Weissman, J.S. (2008). The GET Complex Mediates Insertion of  
569 Tail-Anchored Proteins into the ER Membrane. *Cell* 134, 634–645.

570 Shakya, V.P.S., Barbeau, W.A., Xiao, T., Knutson, C.S., and Hughes, A.L. (2020). The  
571 nucleus is a quality control center for non-imported mitochondrial proteins. *BioRxiv*.

572 Sheff, M.A., and Thorn, K.S. (2004). Optimized cassettes for fluorescent protein tagging

573 in *Saccharomyces cerevisiae*. *Yeast* 21, 661–670.

574 Shurtleff, M.J., Itzhak, D.N., Hussmann, J.A., Schirle Oakdale, N.T., Costa, E.A.,  
575 Jonikas, M., Weibezahn, J., Popova, K.D., Jan, C.H., Sinitcyn, P., et al. (2018). The ER  
576 membrane protein complex interacts cotranslationally to enable biogenesis of multipass  
577 membrane proteins. *Elife* 7, e37018.

578 Vitali, D.G., Sinzel, M., Bulthuis, E.P., Kolb, A., Zabel, S., Mehlhorn, D.G., Figueiredo  
579 Costa, B., Farkas, Á., Clancy, A., Schuldiner, M., et al. (2018). The GET pathway can  
580 increase the risk of mitochondrial outer membrane proteins to be mistargeted to the ER.  
581 *J. Cell Sci.* 131, jcs211110.

582 Wallace, D.C. (2005). A Mitochondrial Paradigm of Metabolic and Degenerative  
583 Diseases, Aging, and Cancer: A Dawn for Evolutionary Medicine. *Annu. Rev. Genet.* 39,  
584 359–407.

585 Wang, X., and Chen, X.J. (2015). A cytosolic network suppressing mitochondria-  
586 mediated proteostatic stress and cell death. *Nature* 524, 481–484.

587 Wang, F., Brown, E.C., Mak, G., Zhuang, J., and Denic, V. (2010). A chaperone  
588 cascade sorts proteins for posttranslational membrane insertion into the endoplasmic  
589 reticulum. *Mol. Cell* 40, 159–171.

590 Wang, F., Chan, C., Weir, N.R., and Denic, V. (2014a). The Get1/2 transmembrane  
591 complex is an endoplasmic-reticulum membrane protein insertase. *Nature* 512, 441–  
592 444.

593 Wang, N., Presti, L. Lo, Zhu, Y.H., Kang, M., Wu, Z., Martin, S.G., and Wu, J.Q.  
594 (2014b). The novel proteins Rng8 and Rng9 regulate the myosin-V Myo51 during fission  
595 yeast cytokinesis. *J. Cell Biol.* 205, 357–375.

596 Wiedemann, N., and Pfanner, N. (2017). Mitochondrial Machineries for Protein Import  
597 and Assembly. *Annu. Rev. Biochem.* 86, 685–714.

598 Wrobel, L., Topf, U., Bragoszewski, P., Wiese, S., Sztolsztener, M.E., Oeljeklaus, S.,  
599 Varabyova, A., Lirski, M., Chroscicki, P., Mroczek, S., et al. (2015). Mistargeted  
600 mitochondrial proteins activate a proteostatic response in the cytosol. *Nature* 524, 485–  
601 488.

602 Young, C.L., Raden, D.L., Caplan, J.L., Czymmek, K.J., and Robinson, A.S. (2012).  
603 Cassette series designed for live-cell imaging of proteins and high-resolution techniques  
604 in yeast. *Yeast* 29, 119–136.

605 Zhou, C., Slaughter, B.D., Unruh, J.R., Guo, F., Yu, Z., Mickey, K., Narkar, A., Ross,  
606 R.T., McClain, M., and Li, R. (2014). Organelle-based aggregation and retention of  
607 damaged proteins in asymmetrically dividing cells. *Cell* 159, 530–542.

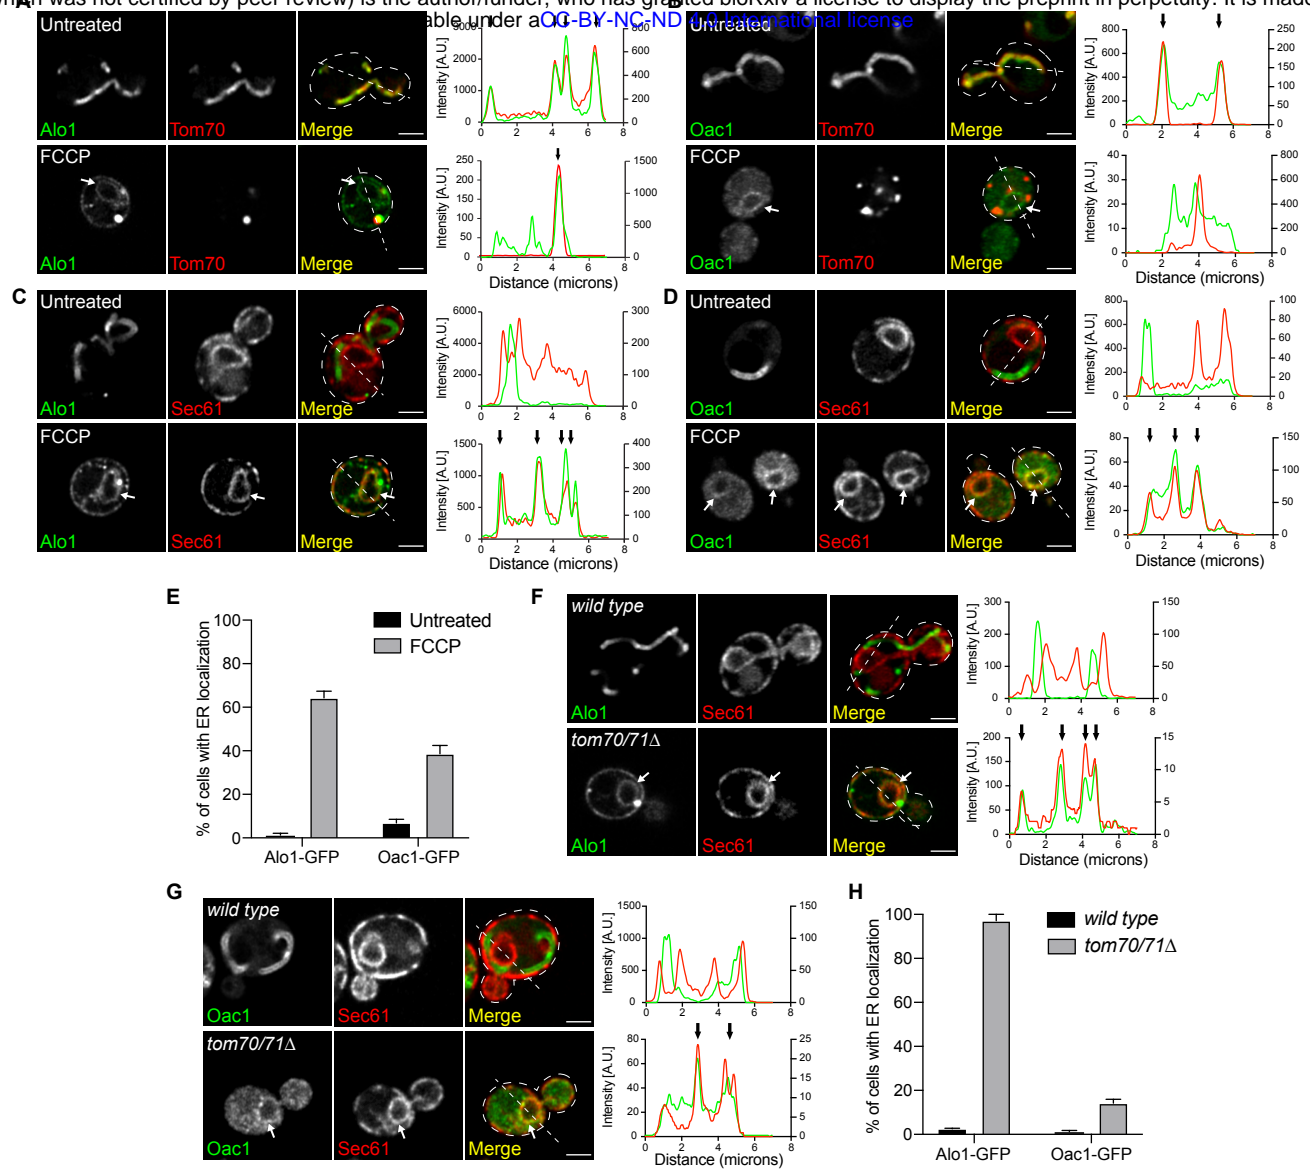

Figure 1

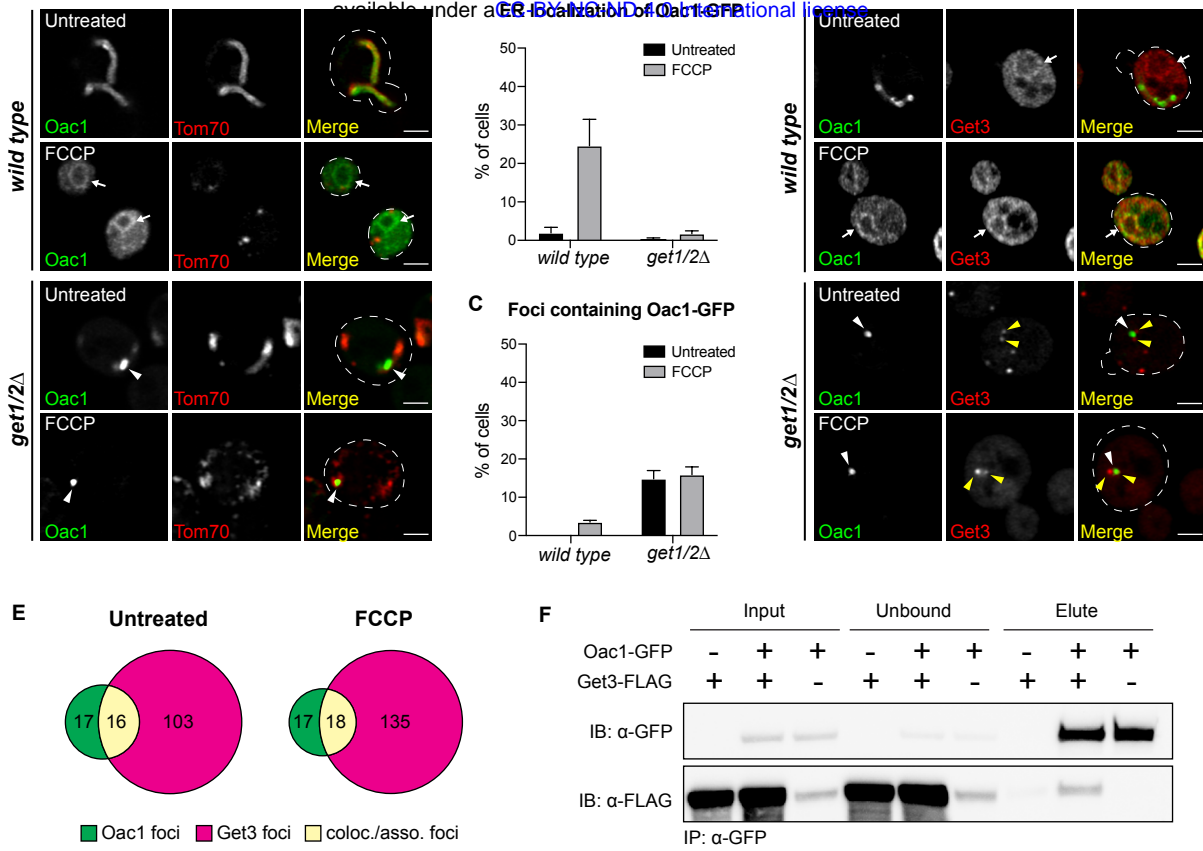

**Figure 2**

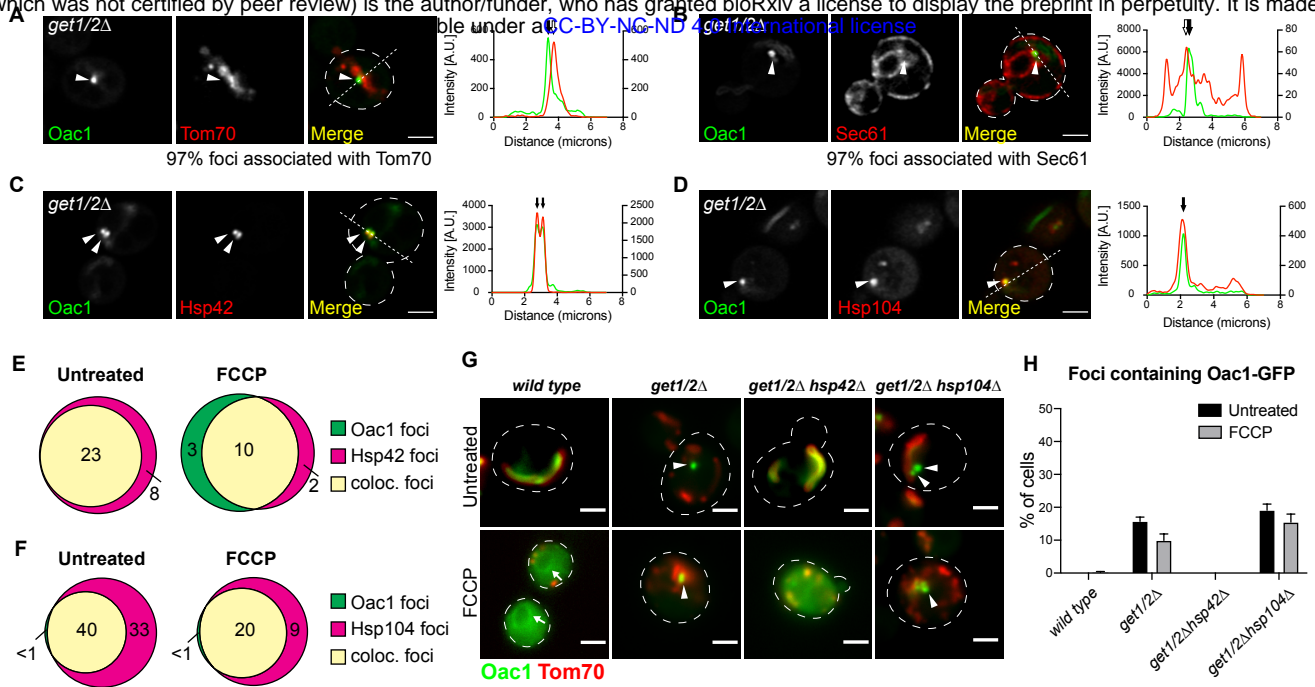

Figure 3

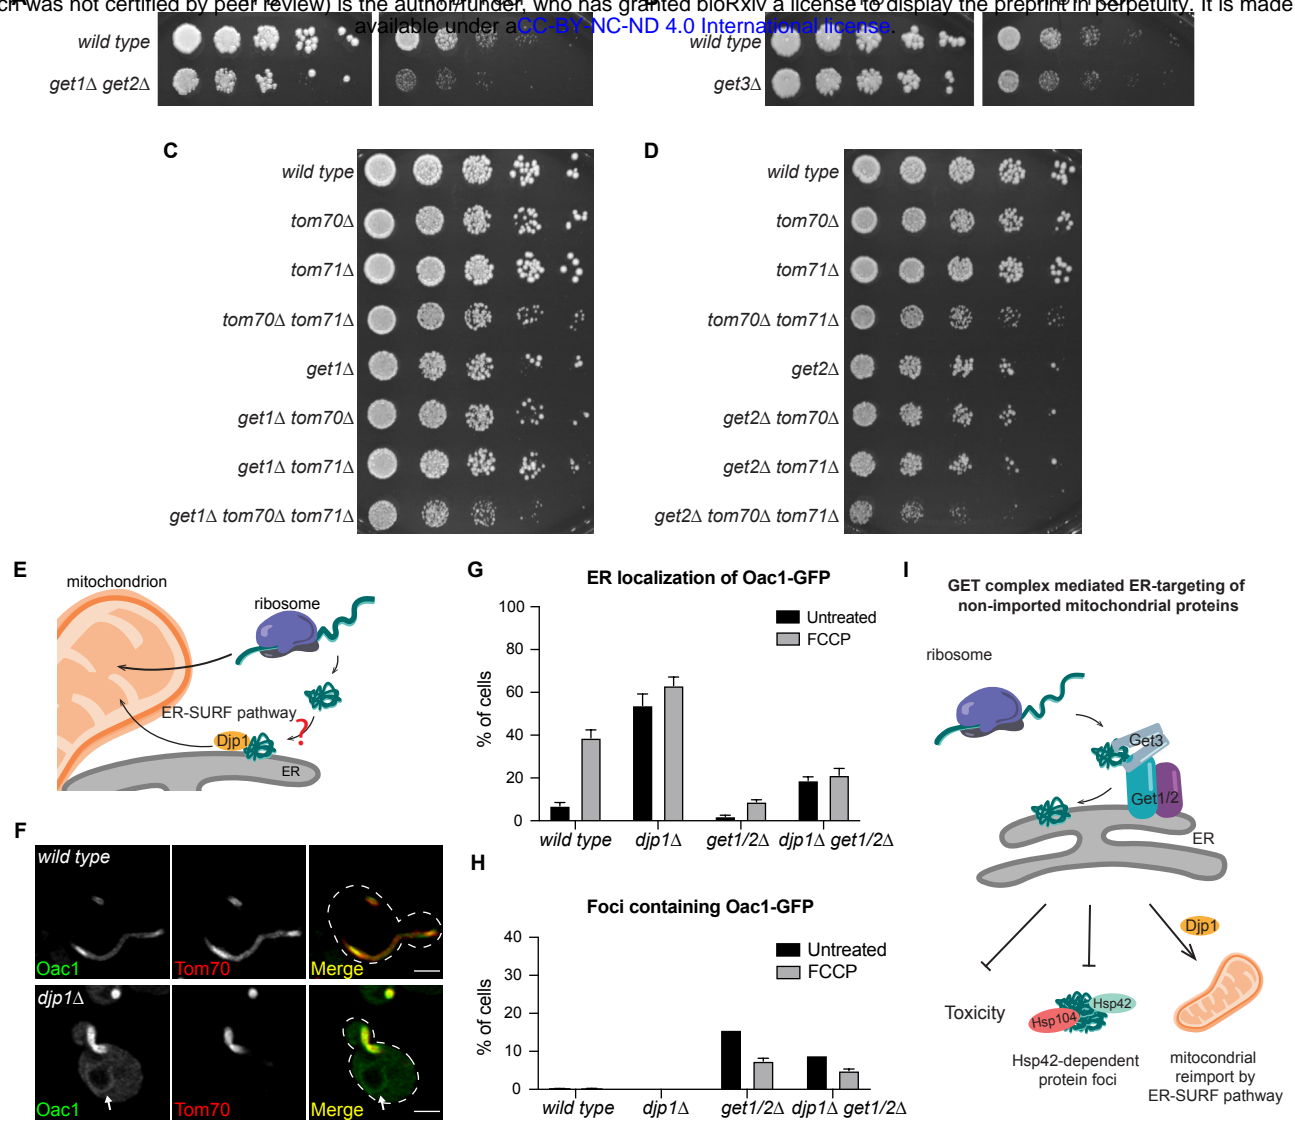

Figure 4



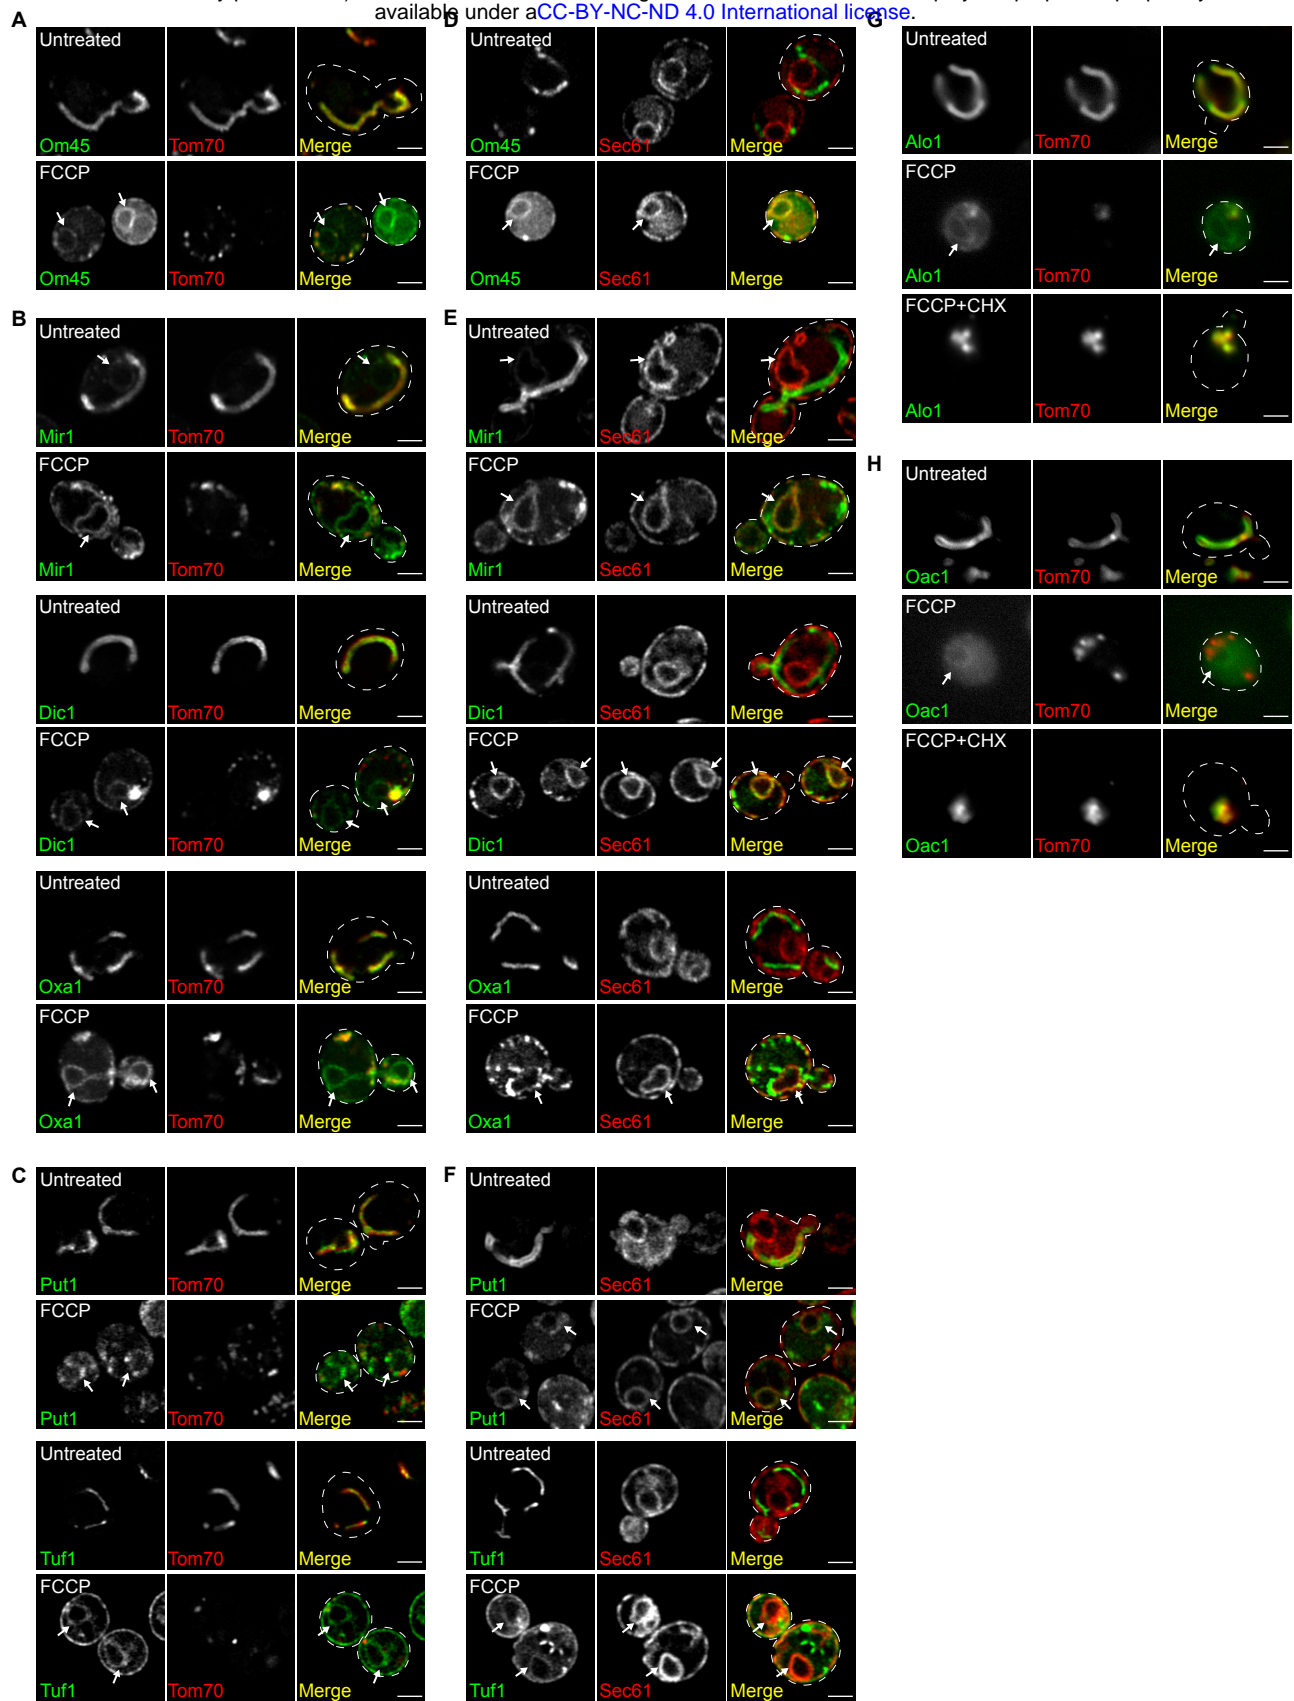

Figure S1

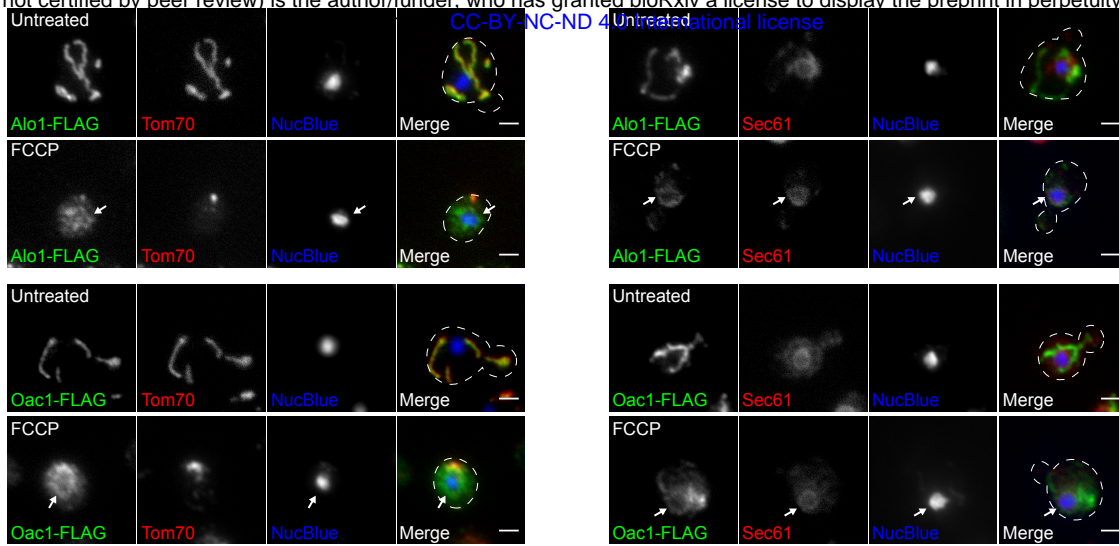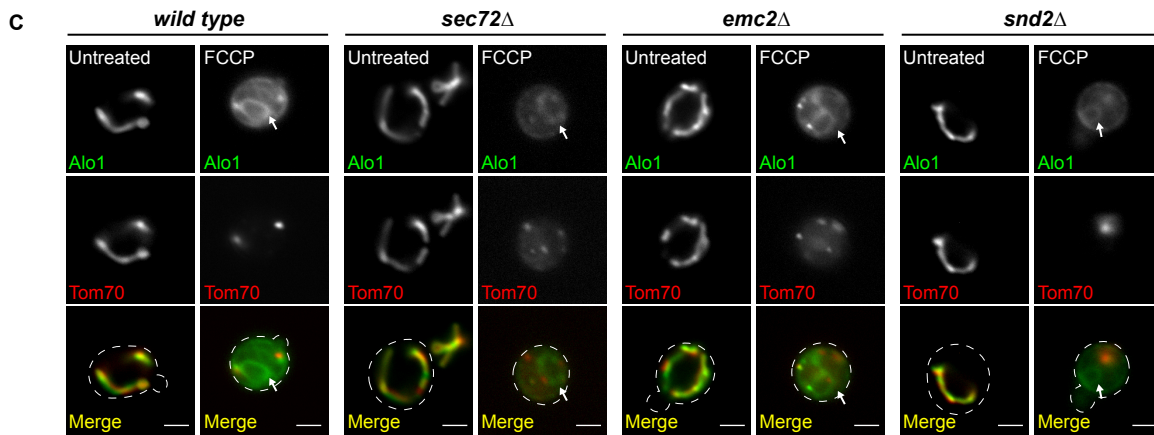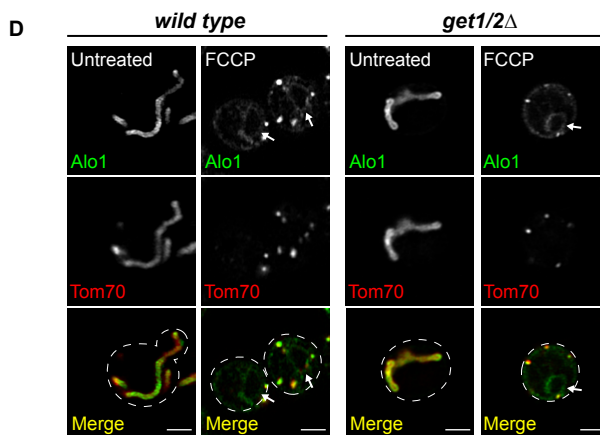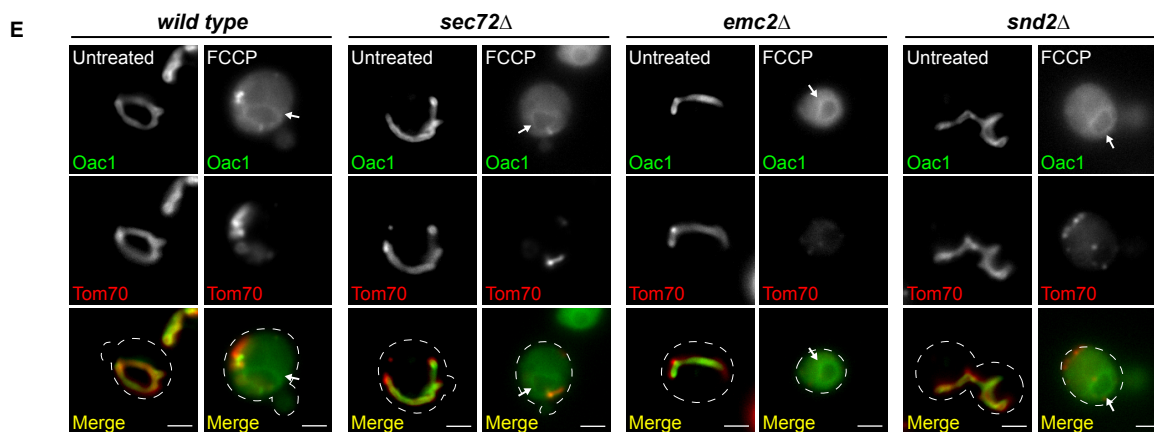

Figure S2

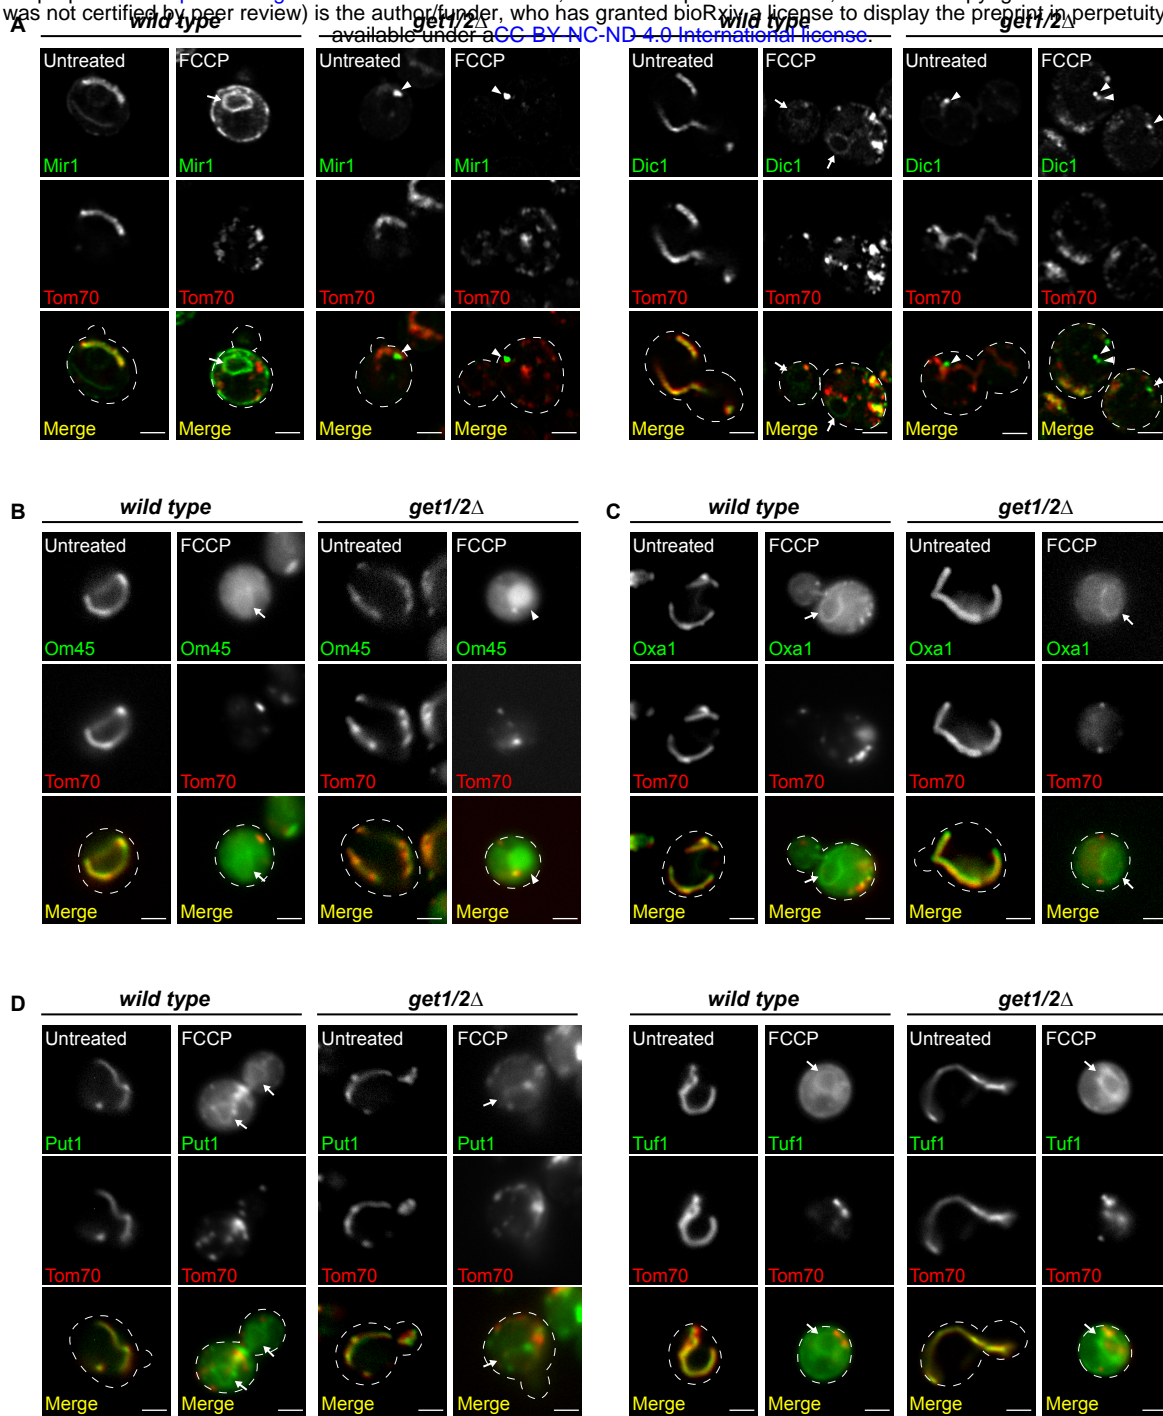

Figure S3

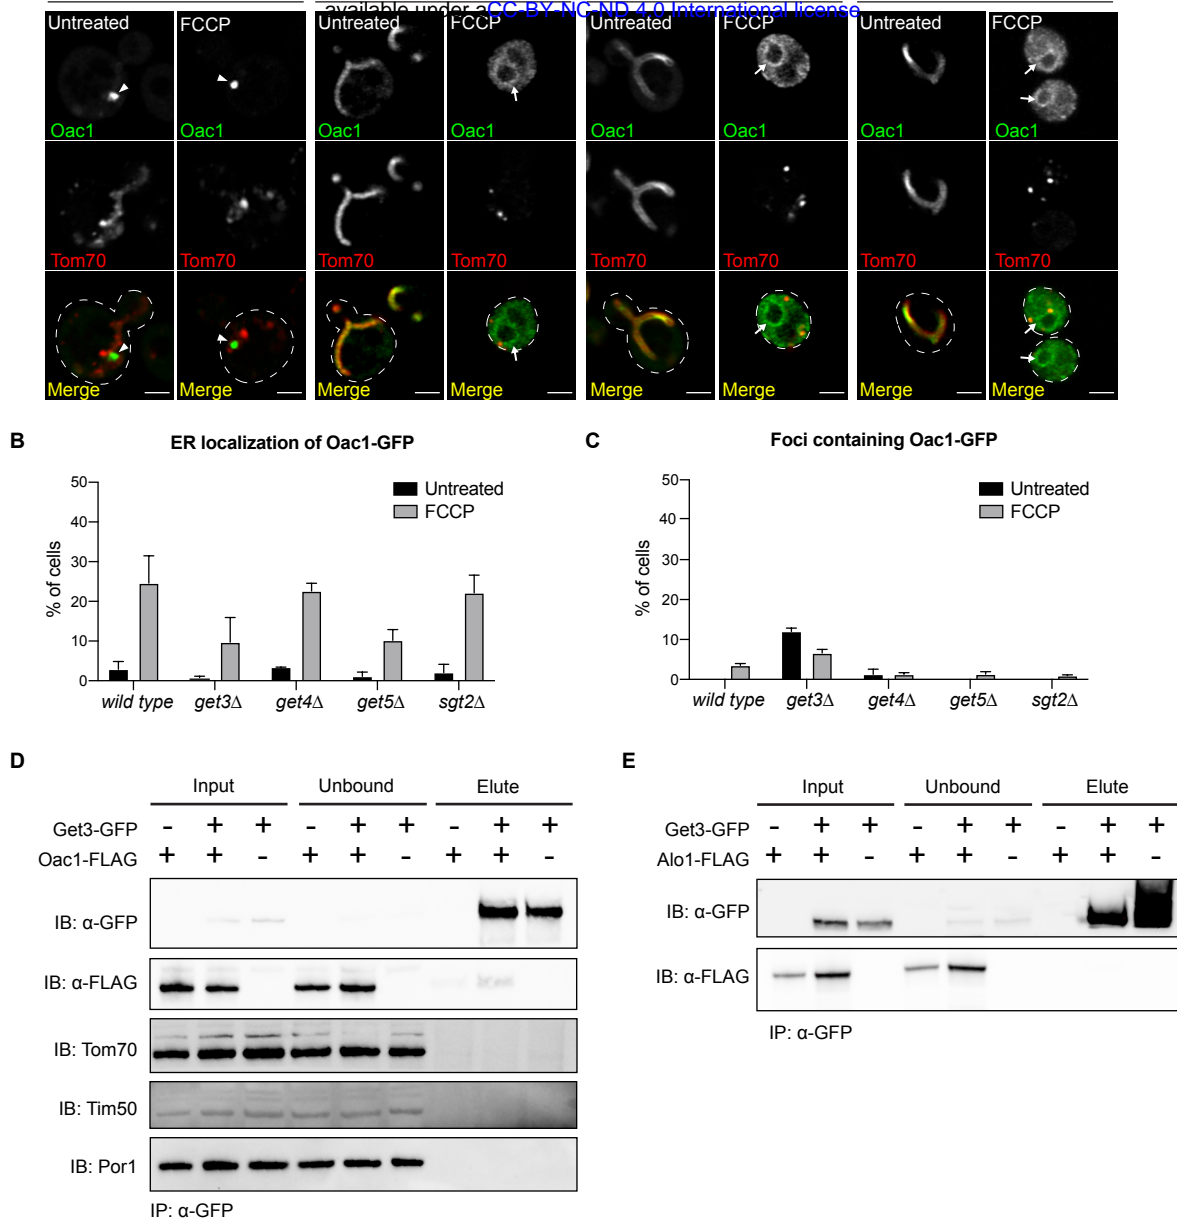

Figure S4

## KEY RESOURCES TABLE

| REAGENT or RESOURCE                                                           | SOURCE                              | IDENTIFIER                                |
|-------------------------------------------------------------------------------|-------------------------------------|-------------------------------------------|
| <b>Antibodies</b>                                                             |                                     |                                           |
| DYKDDDDK Tag Polyclonal Antibody                                              | Invitrogen                          | Cat # PA1-984B<br>RRID: AB_347227         |
| Anti-GFP from mouse IgG1κ                                                     | Sigma-Aldrich                       | Cat # 11814460001<br>RRID: AB_390913      |
| Monoclonal ANTI-FLAG® M2 antibody produced in mouse                           | Sigma-Aldrich                       | Cat # F1804<br>RRID: AB_262044            |
| Rabbit polyclonal anti-Tom70                                                  | Dr. Nikolaus Pfanner                | N/A                                       |
| Rabbit polyclonal anti-Tim50                                                  | Dr. Nikolaus Pfanner                | N/A                                       |
| Porin Monoclonal Antibody (16G9E6BC4)                                         | Invitrogen                          | Cat # 459500<br>RRID: AB_2532239          |
| Peroxidase AffiniPure Donkey Anti-Mouse IgG (H+L)                             | Jackson Immunoresearch              | Cat # 715-035-150<br>RRID: AB_2340770     |
| Goat anti-Mouse IgG (H+L) Cross-Adsorbed Secondary Antibody, Alexa Fluor 488  | Invitrogen                          | Cat # A-11001<br>RRID: AB_2534069         |
| <b>Chemicals, Peptides, and Recombinant Proteins</b>                          |                                     |                                           |
| Carbonyl cyanide 4-(trifluoromethoxy)phenylhydrazone (FCCP)                   | Sigma-Aldrich                       | Cat # C2920; CAS # 370-86-5               |
| Cycloheximide                                                                 | Sigma-Aldrich                       | Cat # C1988; CAS # 66-81-9                |
| cOmplete Protease Inhibitor Cocktail                                          | Sigma-Aldrich                       | Cat # 11697498001                         |
| Phenylmethylsulfonyl fluoride                                                 | Sigma-Aldrich                       | Cat # P7626; CAS # 329-98-6               |
| IGEPAL®                                                                       | Sigma-Aldrich                       | Cat # CA-630; CAS # 9002-93-1             |
| Zymolyase 100T                                                                | US Biological Life Sciences         | Cat # Z1004; CAS # 37340-57-1             |
| Triton X-100                                                                  | Bio-Rad                             | Cat # 1610407; CAS # 9002-93-1            |
| Formaldehyde 16% in aqueous solution, EM Grade                                | VWR                                 | Cat # 100503-914; CAS # 50-00-0           |
| DTT (Dithiothreitol) (> 99% pure) Protease free                               | GOLDBIO                             | Cat # DTT10; CAS # 27565-41-9 / 3483-12-3 |
| <b>Experimental Models: Organisms/Strains</b>                                 |                                     |                                           |
| BY4741 MATa his3Δ1 leu2Δ0 ura3Δ0 met15Δ0                                      | Brachman <i>et al.</i> , 1998; ATCC | Cat # 201388                              |
| BY4743 MATa/MATα his3Δ1/his3Δ1 leu2Δ0/leu2Δ0 ura3Δ0/ura3Δ0 met15Δ0/+ lys2Δ0/+ | Brachman <i>et al.</i> , 1998; ATCC | Cat # 201390                              |
| BY4741 TOM70-mCherry:KanMX ALO1-yeGFP:HisMX                                   | This study                          | AHY3352                                   |
| BY4741 TOM70-mCherry:KanMX OM45-yeGFP:HisMX                                   | This study                          | AHY3933                                   |
| BY4741 TOM70-mCherry:KanMX TUF1-yeGFP:HisMX                                   | This study                          | AHY6859                                   |
| BY4741 TOM70-mCherry:KanMX TUF1-yeGFP:HisMX                                   | This study                          | AHY6860                                   |
| BY4741 TOM70-mCherry:KanMX PUT1-yeGFP:HisMX                                   | This study                          | AHY6861                                   |
| BY4741 SEC61-mCherry:KanMX ALO1-yeGFP:HisMX                                   | This study                          | AHY6950                                   |
| BY4741 TOM70-mCherry:KanMX ALO1-yeGFP:HisMX sec72Δ::URA3                      | This study                          | AHY7061                                   |
| BY4741 TOM70-mCherry:KanMX MIR1-yeGFP:HisMX get1Δ::URA3 get2Δ::HygMX          | This study                          | AHY7110                                   |

|                                                                                     |            |         |
|-------------------------------------------------------------------------------------|------------|---------|
| BY4741 TOM70-mCherry:KanMX ALO1-yeGFP:HisMX get1Δ::URA3 get2Δ::HygMX                | This study | AHY7112 |
| BY4741 SEC61-mCherry:KanMX OM45-yeGFP:HisMX                                         | This study | AHY7143 |
| BY4741 SEC61-mCherry:KanMX OAC1-yeGFP:HisMX                                         | This study | AHY7147 |
| BY4741 SEC61-mCherry:KanMX PUT1-yeGFP:HisMX                                         | This study | AHY7149 |
| BY4741 SEC61-mCherry:KanMX TUF1-yeGFP:HisMX                                         | This study | AHY7151 |
| BY4743 TOM70-mCherry:KanMX/+ MIR1-yeGFP:HisMX/+                                     | This study | AHY7219 |
| BY4741 TOM70-mCherry:KanMX TUF1-yeGFP:HisMX get1Δ::URA3 get2Δ::HygMX                | This study | AHY7238 |
| BY4741 TOM70-mCherry:KanMX OM45-yeGFP:HisMX get1Δ::URA3 get2Δ::HygMX                | This study | AHY7244 |
| BY4741 TOM70-mCherry:KanMX OAC1-yeGFP:HisMX                                         | This study | AHY7296 |
| BY4741 TOM70-mCherry:KanMX OAC1-yeGFP:HisMX                                         | This study | AHY7297 |
| BY4741 TOM70-mCherry:KanMX PUT1-yeGFP:HisMX get1Δ::URA3 get2Δ::HygMX                | This study | AHY7389 |
| BY4741 TOM70-mCherry:KanMX OAC1-yeGFP:HisMX get1Δ::URA3 get2Δ::HygMX                | This study | AHY7391 |
| BY4743 SEC61-mCherry:KanMX/+ MIR1-yeGFP:HisMX/+                                     | This study | AHY7552 |
| BY4741 SEC61-mCherry:KanMX OAC1-yeGFP:HisMX tom70Δ::URA3 tom71Δ::LEU2               | This study | AHY7612 |
| BY4741 SEC61-mCherry:KanMX ALO1-yeGFP:HisMX tom70Δ::URA3 tom71Δ::LEU2               | This study | AHY7616 |
| BY4741 TOM70-mCherry:KanMX ALO1-yeGFP:HisMX snd2Δ::URA3                             | This study | AHY7776 |
| BY4741 TOM70-mCherry:KanMX ALO1-yeGFP:HisMX emc2Δ::URA3                             | This study | AHY7781 |
| BY4741 TOM70-mCherry:KanMX OAC1-yeGFP:HisMX djp1Δ::URA3                             | This study | AHY8186 |
| BY4741 GET3-mCherry:KanMX OAC1-yeGFP:HisMX get1Δ::URA3 get2Δ::HygMX                 | This study | AHY8389 |
| BY4741 Δ HSP104-mCherry:KanMX OAC1-yeGFP:HisMX get1Δ::URA3 get2Δ::HygMX             | This study | AHY8391 |
| BY4741 TOM70-mCherry:KanMX OAC1-yeGFP:HisMX get4Δ::URA3                             | This study | AHY8418 |
| BY4741 TOM70-mCherry:KanMX OAC1-yeGFP:HisMX get5Δ::URA3                             | This study | AHY8420 |
| BY4741 TOM70-mCherry:KanMX OAC1-yeGFP:HisMX get3Δ::URA3                             | This study | AHY8426 |
| BY4741 TOM70-mCherry:KanMX OAC1-yeGFP:HisMX sgt2Δ::URA3                             | This study | AHY8428 |
| BY4741 GET3-5FLAG:KanMX                                                             | This study | AHY8541 |
| BY4741 TOM70-mCherry:KanMX OAC1-yeGFP:HisMX get1Δ::URA3 get2Δ::HygMX hsp104Δ::NatMX | This study | AHY8629 |
| BY4741 GET3-5FLAG:KanMX OAC1-yeGFP:HisMX                                            | This study | AHY8754 |
| BY4741 OAC1-5FLAG:KanMX                                                             | This study | AHY8756 |
| BY4741 OAC1-5FLAG:KanMX GET3-yeGFP:HisMX                                            | This study | AHY8867 |
| BY4741 GET3-yeGFP:HisMX                                                             | This study | AHY8941 |
| BY4741 OAC1-yeGFP:HisMX                                                             | This study | AHY8943 |
| BY4741 TOM70-mCherry:KanMX OXA1-yeGFP:HisMX get1Δ::URA3 get2Δ::HygMX                | This study | AHY9139 |
| BY4741 TOM70-mCherry:KanMX DIC1-yeGFP:HisMX get1Δ::URA3 get2Δ::HygMX                | This study | AHY9141 |

|                                                                                    |                    |          |
|------------------------------------------------------------------------------------|--------------------|----------|
| BY4741 TOM70-mCherry:KanMX OAC1-yeGFP:HisMX snd2Δ::URA3                            | This study         | AHY9149  |
| BY4741 TOM70-mCherry:KanMX OXA1-yeGFP:HisMX                                        | This study         | AHY9234  |
| BY4741 TOM70-mCherry:KanMX DIC1-yeGFP:HisMX                                        | This study         | AHY9236  |
| BY4741 HSP42-mCherry:KanMX OAC1-yeGFP:HisMX get1Δ::URA3 get2Δ::HygMX               | This study         | AHY9378  |
| BY4741 TOM70-mCherry:KanMX OAC1-yeGFP:HisMX get1Δ::URA3 get2Δ::HygMX djp1Δ::NatMX  | This study         | AHY9411  |
| BY4741 get3Δ::HygMX                                                                | This study         | AHY9417  |
| BY4741 TOM70-mCherry:KanMX OAC1-yeGFP:HisMX get1Δ::URA3 get2Δ::HygMX hsp42Δ::NatMX | This study         | AHY9595  |
| MATa his3Δ leu2Δ ura3Δ met15Δ tom70Δ::HygMX                                        | This study         | AHY9732  |
| MATα his3Δ leu2Δ ura3Δ lys2Δ tom70Δ::HygMX                                         | This study         | AHY9733  |
| MATa his3Δ leu2Δ ura3Δ met15Δ tom71Δ::NatMX                                        | This study         | AHY9734  |
| MATα his3Δ leu2Δ ura3Δ lys2Δ tom71Δ::NatMX                                         | This study         | AHY9735  |
| MATa his3Δ leu2Δ ura3Δ met15Δ tom70Δ::HygMX tom71Δ::NatMX                          | This study         | AHY9736  |
| MATα his3Δ leu2Δ ura3Δ lys2Δ tom70Δ::HygMX tom71Δ::NatMX                           | This study         | AHY9737  |
| MATα his3Δ leu2Δ ura3Δ lys2Δ get1Δ::KanMX                                          | This study         | AHY9754  |
| MATa his3Δ leu2Δ ura3Δ met15Δ get2Δ::KanMX                                         | This study         | AHY9755  |
| MATα his3Δ leu2Δ ura3Δ lys2Δ tom70Δ::HygMX get1Δ::KanMX                            | This study         | AHY9759  |
| MATa his3Δ leu2Δ ura3Δ tom70Δ::HygMX get2Δ::KanMX                                  | This study         | AHY9760  |
| MATα his3Δ leu2Δ ura3Δ lys2Δ tom71Δ::NatMX get1Δ::KanMX                            | This study         | AHY9765  |
| MATa his3Δ leu2Δ ura3Δ met15Δ tom71Δ::NatMX get2Δ::KanMX                           | This study         | AHY9766  |
| MATα his3Δ leu2Δ ura3Δ tom71Δ::NatMX tom71Δ::NatMX get1Δ::KanMX                    | This study         | AHY9771  |
| MATa his3Δ leu2Δ ura3Δ lys2Δ tom71Δ::NatMX tom71Δ::NatMX get2Δ::KanMX              | This study         | AHY9772  |
| BY4741 SEC61-mCherry:KanMX OAC1-yeGFP:HisMX get1Δ::URA3 get2Δ::HygMX               | This study         | AHY10109 |
| BY4741 ALO1-5FLAG:KanMX                                                            | This study         | AHY10168 |
| BY4741 ALO1-5FLAG:KanMX GET3-yeGFP:HisMX                                           | This study         | AHY10170 |
| BY4741 GET3-mCherry:KanMX OAC1-yeGFP:HisMX                                         | This study         | AHY10236 |
| BY4741 Δ TOM70-mCherry:KanMX OAC1-yeGFP:HisMX emc2Δ::URA3                          | This study         | AHY10327 |
| BY4741 Δ TOM70-mCherry:KanMX OAC1-yeGFP:HisMX sec72Δ::URA3                         | This study         | AHY10329 |
| BY4741 SEC61-mCherry:KanMX OXA1-yeGFP:HisMX                                        | This study         | AHY10331 |
| BY4741 SEC61-mCherry:KanMX DIC1-yeGFP:HisMX                                        | This study         | AHY10333 |
| BY4741 OAC1-5FLAG:KanMX TOM70-mCherry:HygMX                                        | This study         | AHY10410 |
| BY4741 OAC1-5FLAG:KanMX SEC61-mCherry:HygMX                                        | This study         | AHY10412 |
| BY4741 ALO1-5FLAG:KanMX TOM70-mCherry:HygMX                                        | This study         | AHY10414 |
| BY4741 ALO1-5FLAG:KanMX SEC61-mCherry:HygMX                                        | This study         | AHY10416 |
| Oligonucleotides                                                                   |                    |          |
| See Table S1                                                                       |                    |          |
| Recombinant DNA                                                                    |                    |          |
| Plasmid: pRS40Hyg                                                                  | Daniel Gottschling | N/A      |

|                                |                                       |                 |
|--------------------------------|---------------------------------------|-----------------|
| Plasmid: pRS40Nat              | Daniel Gottschling                    | N/A             |
| Plasmid: pRS400                | Daniel Gottschling                    | N/A             |
| Plasmid: pRS306                | Sikorski and Hieter, 1989             | N/A             |
| Plasmid: pKT128                | Sheff and Thorn, 2004; Addgene        | Plasmid # 8729  |
| Plasmid: pKT127-mCherry        | Daniel Gottschling                    | N/A             |
| Plasmid: pFA6a-mCherry-HphMX   | Wang, 2014; Addgene                   | Plasmid # 39295 |
| Plasmid: pFA6a-5FLAG-KanMX6    | Noguchi and Garabedian, 2008; Addgene | Plasmid # 15983 |
| <b>Software and Algorithms</b> |                                       |                 |
| FIJI                           | Schindelin et al., 2012               | Version 1       |
| Prism                          | GraphPad Software, Inc.               | Version 8       |
| SnapGene                       | GSL Biotech                           | Version 4.2     |
| ZEN Black Edition              | Carl Zeiss Microscopy                 | Version 2.3     |
| ZEN Blue Edition               | Carl Zeiss Microscopy                 | Version 2.6     |
| Photoshop CC                   | Adobe                                 | Version 19      |
| Image Lab                      | Bio-Rad                               | Version 6       |



**Table S1. Oligos used in this study**

| Name                    | Number | Sequence                                                         |
|-------------------------|--------|------------------------------------------------------------------|
| <b>Tagging Primers</b>  |        |                                                                  |
| ALO1 pKT Tag F          | 556    | TATCATAAATGGTATTATAGATCCTAGTGAGTTGTCCGACGGT<br>GACGGTGCTGGTTTA   |
| ALO1 pKT Tag R          | 557    | TTTTTTAGTAAAATATAGAGATTATTGAGACAAAAGAGATC<br>GATGAATTCGAGCTCG    |
| TOM70 pKT Tag F         | 797    | TCAAGAACTTTAGCTAAATTACGCGAACAGGGTTTAATGGG<br>TGACGGTGCTGGTTTA    |
| TOM70 pKT Tag R         | 798    | TTTGCTTCTCCTAAAAGTTTTTAAGTTTATGTTTACTGTTCGA<br>TGAATTCGAGCTCG    |
| TOM70 Longtime<br>Tag F | 1077   | TCAAGAACTTTAGCTAAATTACGCGAACAGGGTTTAATGCG<br>GATCCCCGGGTTAATTAA  |
| TOM70 Longtime<br>Tag R | 1078   | TTTGCTTCTCCTAAAAGTTTTTAAGTTTATGTTTACTGTGAAT<br>TCGAGCTCGTTTAAAC  |
| MIR1 pKT Tag F          | 1156   | GGGTTGCCACCAACCATTGAAATTGGTGGTGGTGGTCATGG<br>TGACGGTGCTGGTTTA    |
| MIR1 pKT Tag R          | 1157   | GAGGAGAGAATATATATGCATGTATCAATCAAGACCATTTTC<br>GATGAATTCGAGCTCG   |
| OM45 pKT Tag F          | 1858   | TGATAAGGGTGATGGTAAATTCTGGAGCTCGAAAAGGACGG<br>TGACGGTGCTGGTTTA    |
| OM45 pKT Tag R          | 1859   | ATGTTATGCGGGAACCAACCCTTTACAATTAGCTATCTAATCG<br>ATGAATTCGAGCTCG   |
| OAC1 pKT Tag F          | 1861   | ACTAGTTTATTCGATAGAGTCGAGAGTTTTAGGCCATAATGGT<br>GACGGTGCTGGTTTA   |
| OAC1 pKT Tag R          | 1862   | CAATGAATGAACTTCAAACCTCGGAGTTTGTTATGGGAATC<br>GATGAATTCGAGCTCG    |
| OAC1 Longtime Tag<br>F  | 2523   | ACTAGTTTATTCGATAGAGTCGAGAGTTTTAGGCCATAATCGG<br>ATCCCCGGGTTAATTAA |
| OAC1 Longtime Tag<br>R  | 2524   | CAATGAATGAACTTCAAACCTCGGAGTTTGTTATGGGAAGA<br>ATTCGAGCTCGTTTAAAC  |
| ALO11 Longtime<br>Tag F | 2525   | TATCATAAATGGTATTATAGATCCTAGTGAGTTGTCCGACCGG<br>ATCCCCGGGTTAATTAA |
| ALO1 Longtime Tag<br>R  | 2526   | TTTTTTAGTAAAATATAGAGATTATTGAGACAAAAGAGAGA<br>ATTCGAGCTCGTTTAAAC  |
| SEC61 pKT Tag F         | 2836   | GTTTACTAAGAACCCTCGTTCCAGGATTTCTGATTTGATGGGT<br>GACGGTGCTGGTTTA   |
| SEC61 pKT Tag R         | 2837   | GCGATTTTTTTTTCTTTGGATATTATTTTCATTTTATATTCGAT<br>GAATTCGAGCTCG    |
| TUF1 pKT Tag F          | 2838   | AAGAACTGTTGGTACCGGTCTAATCACACGTATTATTGAAGGT<br>GACGGTGCTGGTTTA   |
| TUF1 pKT Tag R          | 2839   | ACAGAATATATAGAAATATACTCCAGTTGCATCAATAAGTTC<br>GATGAATTCGAGCTCG   |
| PUT1 pKT Tag F          | 2840   | CAAGGCCATAGCAAAGTCGATTCCAAAAGAGTAGGCCTAGG<br>TGACGGTGCTGGTTTA    |
| PUT1 pKT Tag R          | 2841   | TTGGTTTGTCTTTGAAATTGGAGTATATATTATAGTCCTCTCG<br>ATGAATTCGAGCTCG   |
| OXA1 pKT Tag F          | 3110   | CAAAATTGTTCACAAATCAAACCTTCATTAATAACAAAAAAGG<br>TGACGGTGCTGGTTTA  |

**Table S1. Oligos used in this study**

|                            |      |                                                                       |
|----------------------------|------|-----------------------------------------------------------------------|
| OXA1 pKT Tag R             | 3111 | TTTATATTTTTATATTTACAGAGAGATATAGAGCCTTTATTTCG<br>ATGAATTCGAGCTCG       |
| HSP104 pKT Tag F           | 3207 | CGATAATGAGGACAGTATGGAAATTGATGATGACCTAGATGG<br>TGACGGTGCTGGTTTA        |
| HSP104 pKT Tag R           | 3208 | ATTCTTGTTTCGAAAGTTTTTAAAAATCACACTATATTAATCG<br>ATGAATTCGAGCTCG        |
| GET3 Longtime Tag<br>F     | 3392 | TACTGATGGCAAAGTCATTTATGAGTTAGAAGATAAGGAACG<br>GATCCCCGGGTTAATTA       |
| GET3 Longtime Tag<br>R     | 3393 | TTATATGTCGTATGTATCTATTTATGGTATTCAGGGGCTTTCAT<br>CGATGAATTCGAGCTC      |
| GET3 Longtime Tag<br>Chk F | 3394 | TTATGGGCGCAGGTAATGTTCGATATCTCTG                                       |
| GET3 Longtime Tag<br>Chk R | 3395 | TTGGTTCGTCATTTTGCTGAG                                                 |
| GET3 pKT Tag F             | 3396 | TACTGATGGCAAAGTCATTTATGAGTTAGAAGATAAGGAAGG<br>TGACGGTGCTGGTTTA        |
| GET3 pKT Tag R             | 3397 | TTATATGTCGTATGTATCTATTTATGGTATTCAGGGGCTTTCG<br>ATGAATTCGAGCTCG        |
| DIC1 pKT Tag F             | 3598 | TTGAAAAACATAGGGTTGGCATGCCAAAGGAAGACAAGGG<br>TGACGGTGCTGGTTTA          |
| DIC1 pKT Tag R             | 3599 | TGCTATGTATCTTTATGTTTATGTATATAAATCTGCATCGAT<br>GAATTCGAGCTCG           |
| HSP42 pKT Tag F            | 3709 | ATTGGAGTTTGAAGAAAATCCCAACCCTACGGTAGAAAATGG<br>TGACGGTGCTGGTTTA        |
| HSP42 pKT Tag R            | 3710 | AATATAAATGTATGTATGTGTGTATAAACAGATACGATATTCG<br>ATGAATTCGAGCTCG        |
| SEC61 Longtime<br>Tag F    | 4145 | GTTTACTAAGAACCCTCGTTCCAGGATTTTCTGATTTGATGCGG<br>ATCCCCGGGTTAATTA      |
| SEC61 Longtime<br>Tag R    | 4146 | GCGATTTTTTTTTCTTTGGATATTATTTTCATTTTATATGAATT<br>CGAGCTCGTTTAAAC       |
| <b>KO Primers</b>          |      |                                                                       |
| TOM71 KO F                 | 1185 | ATCTCTACATACTTGTATATACCGAACATAAGAAGCTCTTAGA<br>TTGTACTIONGAGAGTGCAC   |
| TOM71 KO R                 | 1186 | TAACAAAAGTATATATTTGACCAATACCTGACATATCTTCTG<br>TGCGGTATTTACACCCG       |
| TOM71 KO Chk F             | 1187 | ACGACCCGGAGAACCCTGCAATAAGTATA                                         |
| GET1 KO F                  | 2842 | GCAATCCTTGAACACTACGTCTAGTTGATTGAAATAGGAGAAAG<br>ATTGTACTIONGAGAGTGCAC |
| GET1 KO R                  | 2843 | TACATAAACATATTATATACGTACATAATGTAATAAACAACCTG<br>TGCGGTATTTACACCCG     |
| GET1 KO Chk F              | 2844 | GTAGTGGGGTACCTCTTGGGATAACGAGGT                                        |
| GET2 KO F                  | 2845 | CTTCCATGTTTGTAGCATCAGCAACGTAGCTCTAGGAAATAGA<br>TTGTACTIONGAGAGTGCAC   |
| GET2 KO R                  | 2846 | TTATGAGAACAATGTATTATATACTGAACATCTAGAATCTG<br>TGCGGTATTTACACCCG        |
| GET2 KO Chk F              | 2847 | AAGATGTGGGCTGCAGAATTGGACGATATG                                        |
| GET3 KO F                  | 2848 | AAACGTACGACAAGAACAAGAAGATCATCACATTGTAATTAG<br>ATTGTACTIONGAGAGTGCAC   |

**Table S1. Oligos used in this study**

|                |      |                                                                      |
|----------------|------|----------------------------------------------------------------------|
| GET3 KO R      | 2849 | TTATATGTCGTATGTATCTATTTATGGTATTCAGGGGCTTCTGT<br>GCGGTATTTACACCG      |
| GET3 KO Chk F  | 2850 | TCAGATCCTATAGAGCCTGTGGCACTGCTA                                       |
| GET4 KO F      | 2851 | AGTAAACATCATAAAGGGACATAAATAATAACAAGCTAG<br>ATTGTAAGTACTGAGAGTGCAC    |
| GET4 KO R      | 2852 | CGCAAACATATTTATCTATTCCTTCGCAAATATGCTCTTTCTGT<br>GCGGTATTTACACCG      |
| GET4 KO Chk F  | 2853 | TTGTCTTCTTGCAACAACCTTATGAGCTAGC                                      |
| GET5 KO F      | 2854 | ATAAACTAGCGAAGAATAAACTTTATACAAAATTAATCAG<br>ATTGTAAGTACTGAGAGTGCAC   |
| GET5 KO R      | 2855 | GTGTAATAAACAAGTATGTACGTAATACTATACTAATCCTG<br>TGCGGTATTTACACCG        |
| GET5 KO Chk F  | 2856 | GTCTTCGGAACCGAGGTCTTCGTAGAATGA                                       |
| SEC72 KO F     | 2857 | AACTTGCCTAAAGGCATACCAAAGCAAGCTTATTCAACCAG<br>ATTGTAAGTACTGAGAGTGCAC  |
| SEC72 KO R     | 2858 | ACATATCAAGAAAAGGCTAAAATATCTTCGGTTATGCACCT<br>GTGCGGTATTTACACCG       |
| SEC72 KO Chk F | 2859 | AGAAGTCCAAGTTCGATGAACAATTGATGCA                                      |
| SGT2 KO F      | 2860 | CTGACCAAGTGATATCTTATTAATACAAATCTACTGTACGAGA<br>TTGTAAGTACTGAGAGTGCAC |
| SGT2 KO R      | 2861 | CTACATAACATGTATTGCATTAAAGGCTTATTTAGTCCACTG<br>TGCGGTATTTACACCG       |
| SGT2 KO Chk F  | 2862 | GTCTGGCTACGAACCAGAAGATTCCAGGTT                                       |
| GET1 KO Chk R  | 2863 | GGAGGACATTAAGAATACTGGAG                                              |
| GET2 KO Chk R  | 2864 | GTAAGTACTGACATCCACACTCG                                              |
| GET3 KO Chk R  | 2865 | GAGTCAGTTACATCACCAGAG                                                |
| GET4 KO Chk R  | 2866 | GATTACTTCTTCTGCACAC                                                  |
| GET5 KO Chk R  | 2867 | ATCGCGGTAGAGAGTATGTG                                                 |
| SEC72 KO Chk R | 2868 | CACGAGTAATGAATGGTCTG                                                 |
| SGT2 KO Chk R  | 2869 | CTGCTTACTCAACTGTCTTACGC                                              |
| SND2 KO F      | 2939 | GAAGACACCAAAGGCAGTGGTCTAAGTTTGTGTTGGTAGAAG<br>ATTGTAAGTACTGAGAGTGCAC |
| SND2 KO R      | 2940 | TAGAAAGCAAAAAATTTCAAAAACGTTTGAAAAGCTTTGTCT<br>GTGCGGTATTTACACCG      |
| SND2 KO Chk F  | 2941 | AGTATGAGGATGCCATGATGAATACAACCA                                       |
| SND2 KO Chk R  | 2942 | GGTACAATGTTGGCAGGAC                                                  |
| EMC2 KO F      | 2951 | ATTGGAACGGAGAAAATTATAGAAAGCAGTAGATAAAAACA<br>GATTGTAAGTACTGAGAGTGCAC |
| EMC2 KO R      | 2952 | TCTCACCTATCTTTTTTTTTCTTCTAATTTGGCTCCGTCTGTG<br>CGGTATTTACACCG        |
| EMC2 KO Chk F  | 2953 | CAAGCTTGGCCATTGCCTGATACGGAATAA                                       |
| EMC2 KO Chk R  | 2954 | CACGCTTACAACAACCTCAG                                                 |
| DJP1 KO F      | 3112 | AAGTGTCTTCTGCGGCCAGAAGGGGCATTATACAAAAGATAG<br>ATTGTAAGTACTGAGAGTGCAC |

**Table S1. Oligos used in this study**

|                 |      |                                                                      |
|-----------------|------|----------------------------------------------------------------------|
| DJP1 KO R       | 3113 | AATTTTTGAATTTTTAATATACAAGAGATGATTGCTAACTCTG<br>TGCGGTATTTACACACCG    |
| DJP1 KO Chk F   | 3114 | AAGCCATAAGTGAGGAATCTCTGTCCCAT                                        |
| DJP1 KO Chk R   | 3115 | CTACAGGGACTCCATATTCAG                                                |
| HSP104 KO F     | 3210 | AAAGAAATCAACTACACGTACCATAAAATATACAGAATATAG<br>ATTGTAAGTACTGAGAGTGCAC |
| HSP104 KO R     | 3211 | ATTCTTGTTTCGAAAGTTTTTAAAAATCACACTATATTAAGTCTG<br>TGCGGTATTTACACACCG  |
| HSP104 KO Chk F | 3212 | ACATATTAACATTGAACCCTCCATCGTGGT                                       |
| HSP104 KO Chk R | 3213 | GTTATCAACGCCATATGTCC                                                 |
| TOM70 KO F      | 3318 | GAAGTGAAATTACAGCTCACATCTAGGTTCTCAATTGCCAAG<br>ATTGTAAGTACTGAGAGTGCAC |
| TOM70 KO R      | 3319 | TTTGTCTTCTCCTAAAAGTTTTTAAAGTTTATGTTTACTGTCTGT<br>GCGGTATTTACACACCG   |
| TOM70 KO Chk F  | 3320 | TTATGCTCGTCTCACTCATCTCATCGGTAC                                       |
| TOM70 KO Chk R  | 3321 | TAATGATCTATGGGACCAGCC                                                |
| HSP42 KO F      | 3554 | CCATATCCCACACAAATTAAGATCATACCAAGCCGAAGCAAG<br>ATTGTAAGTACTGAGAGTGCAC |
| HSP42 KO R      | 3555 | AATATAAATGTATGTATGTGTGTATAAACAGATACGATATCTG<br>TGCGGTATTTACACACCG    |
| HSP42 KO Chk F  | 3556 | ATAGCAAGAGATGGAATGGTAATGCTTGGC                                       |
| HSP42 KO Chk R  | 3557 | CTCTTCAGAAGCAATGGGAGC                                                |
| TOM71 KO Chk R  | 3558 | GAGGAAGAGCCATTAGGTGTGC                                               |
